# Supplementary material
Source: PubMed Central journal article supplement (PMC4247587)
Supplement: supp_tpc.114.131185_tpc131185_Supplemental.pdf [file supp_tpc.114.131185_tpc131185_Supplemental.pdf]

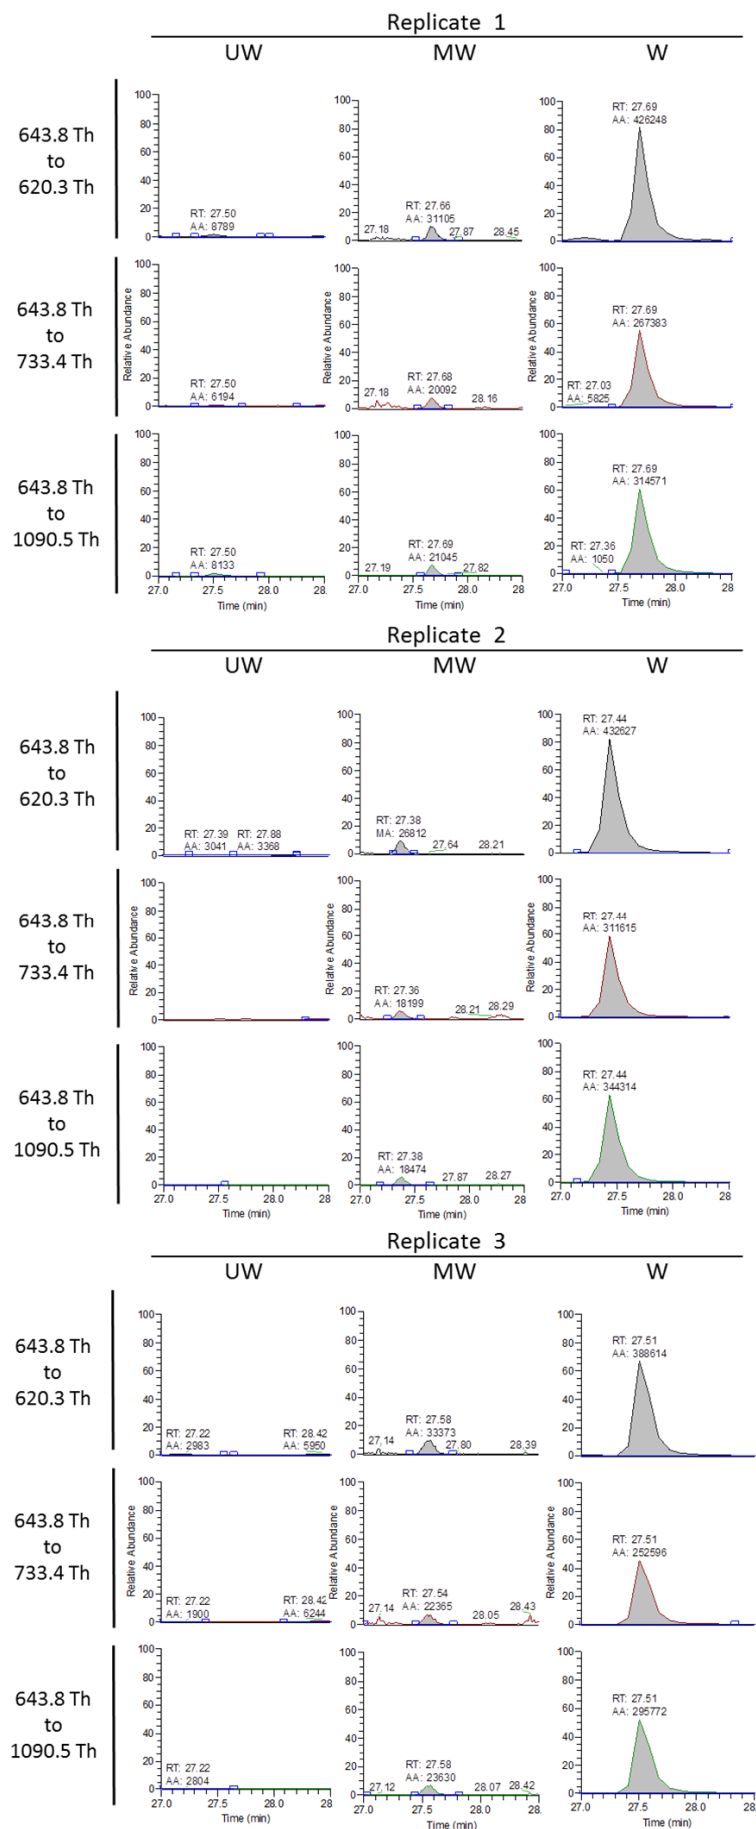

**Supplemental Figure 1.** Abundances of selected CAPE1 transitions in unwounded (UW), mechanically wounded (MW) and wounded plus MeJA (W) treated tomato. The doubly charged CAPE1 precursor  $m/z$  643.8 was selected and targeted to the fragments of 620.3, 733.4 and 1090.5 using nanoUHPLC-SRM-MS.

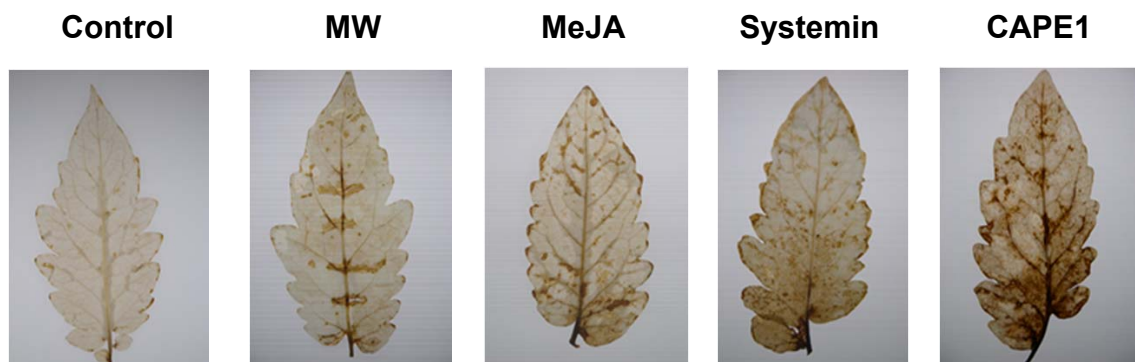

**Supplemental Figure 2.** Study of CAPE1 bioactivities in the triggering of leaf tissue H<sub>2</sub>O<sub>2</sub> production. Detached tomato leaves were treated with water (Control), mechanical wounding (MW), 1.25 mM MeJA, 250 nM systemin and 250 nM CAPE1 peptide for 4 hours, respectively. After the treatment, 1 mg/ml of diaminobenzidine (DAB) was applied to visualize H<sub>2</sub>O<sub>2</sub> accumulation. Images are representative of the results of three biological repeats.

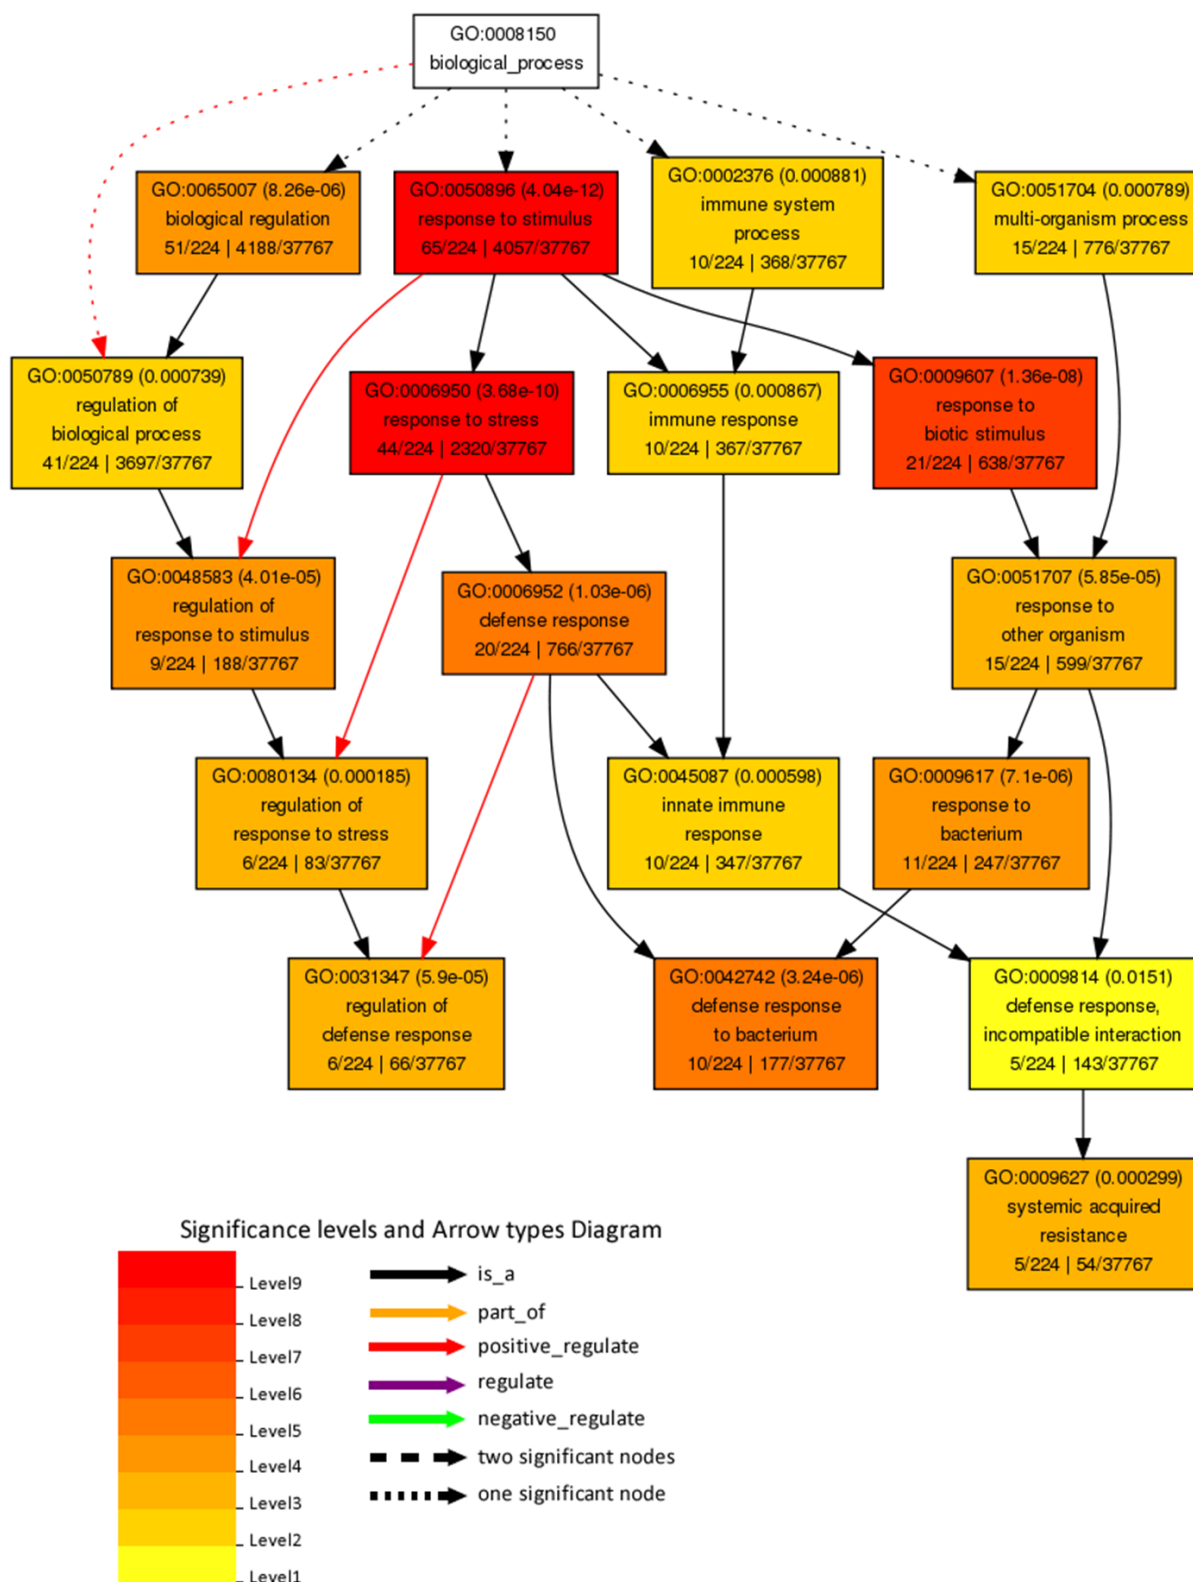

**Supplemental Figure 3.** Functional categorization of the defense genes induced by CAPE1 using hierarchy of GO categorization analyzed by Blast2GO and agriGO. The significance levels diagram showed the grade of color of a box is positively correlated to the GO enrichment level of the term. Solid, dashed, and dotted lines represent two, one and zero enriched terms at both ends connected by the line, respectively. The rank direction of the graph is set to from top to bottom.

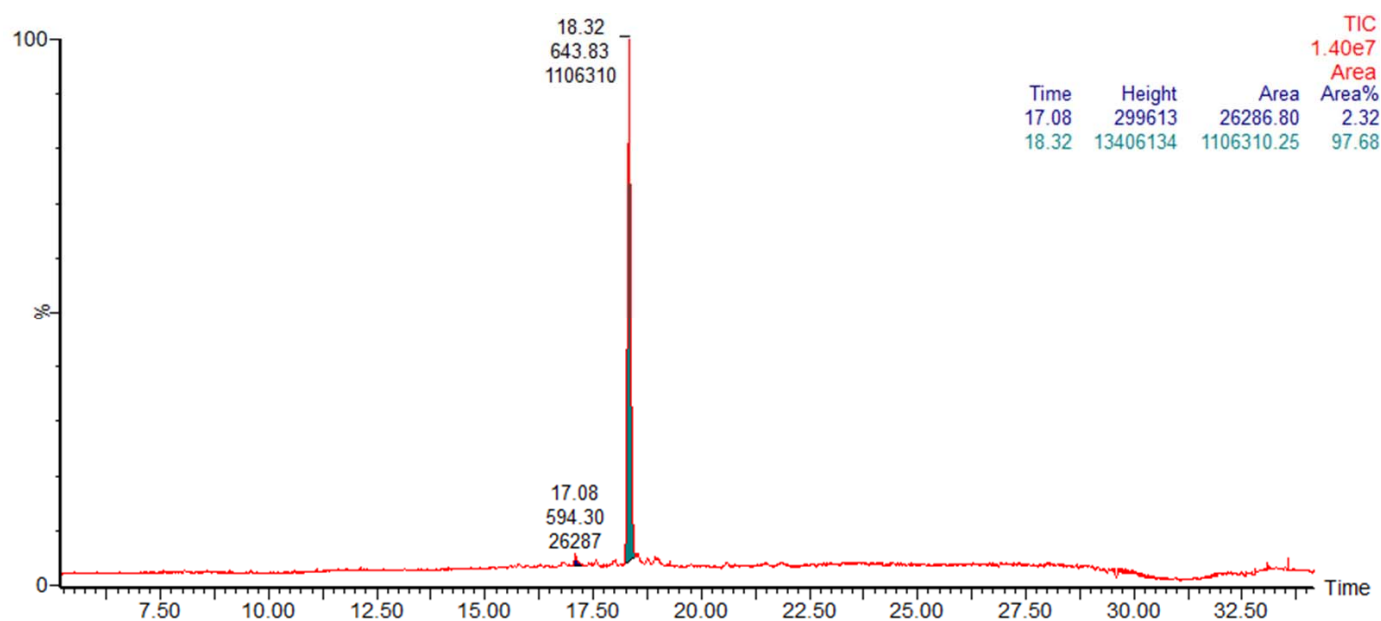

**Supplemental Figure 4.** Purity evaluation of CAPE1 peptide using nanoUHPLC-MS. Synthetic CAPE1 peptide (0.4 pmol) was analyzed by nanoUHPLC-MS with 35 min gradient and the chromatographic peak areas of the CAPE1 and impurities were labeled and integrated. The CAPE1 peptide purity was determined to be 97.68%.

**Supplemental Table 1.** Total identified and quantified endogenous peptides observed in unwounded and wounded plus MeJA treated tomato.

| Proprotein Information |                                                                                          | Peptide Identification                                                                                                                            |                                                                                                                               |                                                                                                                               |                                                                                       |                                           |                                                                                                |                                                                                             |                                                                              |                                                              |                                                                                                                         | Peptide Ratio (W/UW) <sup>a</sup>                                     |                                                                       |
|------------------------|------------------------------------------------------------------------------------------|---------------------------------------------------------------------------------------------------------------------------------------------------|-------------------------------------------------------------------------------------------------------------------------------|-------------------------------------------------------------------------------------------------------------------------------|---------------------------------------------------------------------------------------|-------------------------------------------|------------------------------------------------------------------------------------------------|---------------------------------------------------------------------------------------------|------------------------------------------------------------------------------|--------------------------------------------------------------|-------------------------------------------------------------------------------------------------------------------------|-----------------------------------------------------------------------|-----------------------------------------------------------------------|
| Accession Number       | Description                                                                              | Peptide Sequence                                                                                                                                  | MD Score                                                                                                                      | MASCOT Score                                                                                                                  | Observed M/Z                                                                          | Z                                         | Observed MW                                                                                    | Theor. MW                                                                                   | Mass Error                                                                   | Scoring Fragments                                            | RT (min)                                                                                                                | Ratio                                                                 | Norm. Ratio                                                           |
| Internal Standard      | β-casien                                                                                 | LLYQEPVLGPVR                                                                                                                                      | 36.84~61.66                                                                                                                   | 51.47~78.69                                                                                                                   | 692.42                                                                                | 2                                         | 1382.83                                                                                        | 1382.79                                                                                     | ±0.08                                                                        | 6~10                                                         | 38.75~40.20                                                                                                             | 1.63                                                                  | 1.00                                                                  |
| Solyc05g051750.2.1     | Prosystemin                                                                              | AVQSKPPSKRDPKMQTD                                                                                                                                 | 21.35                                                                                                                         | 38.18                                                                                                                         | 1005.54                                                                               | 2                                         | 2009.07                                                                                        | 2009.04                                                                                     | 0.04                                                                         | 18                                                           | 21.52                                                                                                                   | 9999 <sup>b</sup>                                                     | 9999 <sup>b</sup>                                                     |
| Solyc05g025600.1.1     | Chloroplast photosystem II subunit X                                                     | VSNFDPVKR                                                                                                                                         | 21.71                                                                                                                         | 40.69                                                                                                                         | 531.28                                                                                | 2                                         | 1060.55                                                                                        | 1060.57                                                                                     | -0.01                                                                        | 5                                                            | 26.16                                                                                                                   | 9999 <sup>b</sup>                                                     | 9999 <sup>b</sup>                                                     |
| Solyc00g174340.1.1     | Pathogenesis-related protein 1b                                                          | PVGNWIGQRPY                                                                                                                                       | 41.91                                                                                                                         | 53.37                                                                                                                         | 643.86                                                                                | 2                                         | 1285.7                                                                                         | 1285.66                                                                                     | 0.05                                                                         | 8                                                            | 36.84                                                                                                                   | 9999 <sup>b</sup>                                                     | 9999 <sup>b</sup>                                                     |
| Solyc01g007350.2.1     | Photosystem I reaction center subunit VIII                                               | ASLFLHVQKNK                                                                                                                                       | 38.52                                                                                                                         | 56.85                                                                                                                         | 642.88                                                                                | 2                                         | 1283.75                                                                                        | 1283.73                                                                                     | 0.01                                                                         | 7                                                            | 29.04                                                                                                                   | 19.08                                                                 | 11.71                                                                 |
| Solyc12g035280.1.1     | Photosystem II CP47 chlorophyll apoprotein                                               | LGDPPTKRQAA                                                                                                                                       | 26.31                                                                                                                         | 45.66                                                                                                                         | 579.33                                                                                | 2                                         | 1156.65                                                                                        | 1156.62                                                                                     | 0.03                                                                         | 5                                                            | 21.47                                                                                                                   | 7.70                                                                  | 4.72                                                                  |
| Solyc11g071640.1.1     | Beta-D-glucosidase                                                                       | SHNDPLFHFGFLTKPKVK                                                                                                                                | 45.86                                                                                                                         | 46.63                                                                                                                         | 714.73                                                                                | 3                                         | 2141.16                                                                                        | 2141.11                                                                                     | 0.05                                                                         | 14                                                           | 41.75                                                                                                                   | 4.43                                                                  | 2.72                                                                  |
| Solyc01g104170.2.1     | Ankyrin repeat domain-containing protein 2                                               | DVLKLEKDAFL                                                                                                                                       | 21.47~32.00                                                                                                                   | 38.68~42.18                                                                                                                   | 702.42                                                                                | 2                                         | 1402.82                                                                                        | 1402.81                                                                                     | 0.01                                                                         | 8                                                            | 50.47                                                                                                                   | 4.04                                                                  | 2.48                                                                  |
| Solyc04g082010.1.1     | Plastocyanin                                                                             | LLNAAGETYSVTLSE                                                                                                                                   | 30.74~49.74                                                                                                                   | 43.55~59.25                                                                                                                   | 784.4                                                                                 | 2                                         | 1566.78                                                                                        | 1566.78                                                                                     | ±0.01                                                                        | 10~11                                                        | 40.54~40.74                                                                                                             | 2.37                                                                  | 1.45                                                                  |
| Solyc09g059020.2.1     | Alcohol dehydrogenase zinc-containing                                                    | ENLELIVGLVKEGK                                                                                                                                    | 47.66                                                                                                                         | 69.64                                                                                                                         | 770.96                                                                                | 2                                         | 1539.91                                                                                        | 1539.89                                                                                     | 0.02                                                                         | 8                                                            | 44.17                                                                                                                   | 1.91                                                                  | 1.17                                                                  |
| Solyc11g072190.1.1     | Elongation factor beta-1                                                                 | VSVDTLIEERL                                                                                                                                       | 33.72~57.55                                                                                                                   | 43.22~81.11                                                                                                                   | 637.35                                                                                | 2                                         | 1272.69                                                                                        | 1272.69                                                                                     | ±0.01                                                                        | 6~8                                                          | 43.81~44.15                                                                                                             | 1.27                                                                  | 0.78                                                                  |
| Solyc08g007510.2.1     | ER-derived vesicles protein ERV14                                                        | LAHIILL                                                                                                                                           | 40.23                                                                                                                         | 44.88                                                                                                                         | 453.34                                                                                | 2                                         | 904.67                                                                                         | 904.61                                                                                      | 0.06                                                                         | 5                                                            | 44.96                                                                                                                   | 0.83                                                                  | 0.51                                                                  |
| Solyc06g007800.2.1     | Mitochondrial import inner membrane translocase subunit Tim17/Tim22/Tim23 family protein | KLPEWSPQVL                                                                                                                                        | 23.26                                                                                                                         | 38.05                                                                                                                         | 655.39                                                                                | 2                                         | 1308.77                                                                                        | 1308.74                                                                                     | 0.02                                                                         | 5                                                            | 38.29                                                                                                                   | 0.81                                                                  | 0.50                                                                  |
| Solyc06g050910.1.1     | Unknown Protein                                                                          | IKLPLILQ                                                                                                                                          | 42.56                                                                                                                         | 58.07                                                                                                                         | 469.34                                                                                | 2                                         | 936.67                                                                                         | 936.64                                                                                      | 0.03                                                                         | 6                                                            | 43.54                                                                                                                   | 0.69                                                                  | 0.42                                                                  |
| Solyc05g055310.2.1     | Copper chaperone                                                                         | FDIDLKEQK                                                                                                                                         | 26.49~29.47                                                                                                                   | 42.12~44.02                                                                                                                   | 568.3                                                                                 | 2                                         | 1134.59                                                                                        | 1134.59                                                                                     | ±0.02                                                                        | 8                                                            | 32.08~32.28                                                                                                             | 0.13                                                                  | 0.08                                                                  |
| Solyc05g054070.2.1     | 60S ribosomal protein L6                                                                 | KAIEGIPELKAYLSARF                                                                                                                                 | 36.14                                                                                                                         | 46.13                                                                                                                         | 636.04                                                                                | 3                                         | 1905.1                                                                                         | 1905.07                                                                                     | 0.03                                                                         | 7                                                            | 44.69                                                                                                                   | -9999 <sup>c</sup>                                                    | -9999 <sup>c</sup>                                                    |
| Solyc05g056390.2.1     | chaperonin                                                                               | FHLYRDEDILGTL                                                                                                                                     | 25.17~35.59                                                                                                                   | 43.33~61.11                                                                                                                   | 796.39                                                                                | 2                                         | 1590.76                                                                                        | 1590.8                                                                                      | ±0.05                                                                        | 6~15                                                         | 43.57~43.96                                                                                                             | -9999 <sup>c</sup>                                                    | -9999 <sup>c</sup>                                                    |
| Solyc07g044860.2.1     | Oxygen-evolving enhancer protein 2, chloroplastic                                        | KFVENAATSFSI<br>KFVENAATSFSIA                                                                                                                     | 39.23<br>40.16~58.74                                                                                                          | 49.38<br>59.38~78.22                                                                                                          | 657.35<br>692.86                                                                      | 2<br>2                                    | 1312.69<br>1383.7                                                                              | 1312.67<br>1383.7                                                                           | 0.03<br>0                                                                    | 8<br>9~10                                                    | 40.20<br>38.47~39.02                                                                                                    | 111.62<br>1.25                                                        | 68.48<br>0.77                                                         |
| Solyc06g063370.2.1     | Chlorophyll a-b binding protein 1A, chloroplastic                                        | LTVIGGASERVPT<br>TVIGGASERVPT                                                                                                                     | 22.63~62.90<br>24.32~35.54                                                                                                    | 41.92~86.53<br>40.62~47.29                                                                                                    | 650.39<br>593.83                                                                      | 2<br>2                                    | 1298.77<br>1185.65                                                                             | 1298.72<br>1185.64                                                                          | ±0.05<br>0.01                                                                | 6~10<br>7                                                    | 33.38~35.15<br>28.78                                                                                                    | 3.73<br>0.57                                                          | 2.29<br>0.35                                                          |
| Solyc02g038690.1.1     | Histone H2B                                                                              | IQTAVRLVLPGE<br>IQTAVRLVLPGEL<br>EIQTAVRLVLPGEL                                                                                                   | 29.2<br>28.01~54.30<br>29.75~49.83                                                                                            | 38.23<br>41.74~67.78<br>42.82~62.43                                                                                           | 648.41<br>704.94<br>769.44                                                            | 2<br>2<br>2                               | 1294.8<br>1407.86<br>1536.87                                                                   | 1294.76<br>1407.84<br>1536.89                                                               | 0.04<br>±0.01<br>-0.02                                                       | 6<br>13~15<br>13~17                                          | 41.81<br>46.23~46.76<br>46.67~46.94                                                                                     | 5.35<br>0.27<br>0.80                                                  | 3.28<br>0.17<br>0.49                                                  |
| Solyc01g087520.2.1     | Ferredoxin-thioredoxin reductase variable chain                                          | EGRSTPVKFS AHLKEDE<br>EGRSTPVKFS AHLKED<br>EGRSTPVKFS AHLKEDE<br>PYKVEFVDDL<br>YVAVHKGKQISANLPYKVEFVDDL                                           | 24.72~59.75<br>27.28<br>24.72~59.75<br>26.93<br>47.47                                                                         | 37.34~67.73<br>39.74<br>37.34~67.73<br>42.95<br>47.47                                                                         | 483.24<br>600.97<br>644.01<br>662.35<br>708.89                                        | 4<br>3<br>3<br>2<br>4                     | 1928.92<br>1799.9<br>1929.01<br>1322.68<br>2831.51                                             | 1928.96<br>1799.92<br>1928.96<br>1322.68<br>2831.52                                         | -0.04<br>-0.02<br>±0.05<br>0.01<br>-0.01                                     | 8<br>8<br>8~9<br>7<br>10                                     | 26.67<br>26.58<br>26.67~27.01<br>44.66<br>42.43                                                                         | 1.94<br>29.71<br>6.23<br>0.14<br>0.27                                 | 1.19<br>18.23<br>3.82<br>0.09<br>0.17                                 |
| Solyc09g063130.2.1     | Photosystem I reaction center subunit IV A                                               | PKTRYPVVVR<br>NKVNYANVSTN<br>NKVNYANVSTN<br>NKVNYANVSTN<br>NKVNYANVSTN<br>NKVNYANVSTN<br>NKVNYANVSTN<br>NKVNYANVSTN<br>NKVNYANVSTN<br>NKVNYANVSTN | 20.95~27.72<br>26.20~33.25<br>23.06<br>31.07~67.87<br>31.18~85.88<br>40.55~57.53<br>56.12~79.63<br>55.72~58.40<br>49.06~54.60 | 37.64~46.28<br>40.05~48.23<br>38.75<br>40.19~73.19<br>40.12~91.04<br>44.58~63.34<br>57.96~86.34<br>55.72~64.74<br>53.05~61.02 | 607.86<br>612.31<br>750.86<br>786.4<br>887.46<br>965<br>1079.02<br>1152.56<br>1200.07 | 2<br>2<br>2<br>2<br>3<br>2<br>2<br>2<br>2 | 1213.71<br>1222.6<br>1499.71<br>1570.78<br>2659.37<br>1927.98<br>2156.03<br>2303.11<br>2398.12 | 1213.73<br>1222.59<br>1499.7<br>1570.74<br>2659.28<br>1927.89<br>2156<br>2303.07<br>2398.13 | -0.02<br>±0.01<br>0.01<br>±0.05<br>±0.09<br>±0.09<br>±0.02<br>±0.04<br>±0.02 | 6<br>6~11<br>6<br>7~11<br>8~20<br>10~14<br>12~14<br>10<br>10 | 25.38<br>23.52~24.20<br>28.62<br>28.61~28.82<br>38.14~38.75<br>32.46~34.21<br>36.34~36.41<br>37.91~37.96<br>42.06~42.11 | 9.90<br>0.33<br>1.40<br>2.46<br>20.97<br>0.43<br>5.70<br>3.25<br>0.02 | 6.07<br>0.20<br>0.86<br>1.51<br>12.87<br>0.26<br>3.50<br>1.99<br>0.01 |
| Solyc01g107330.2.1     | SWIB/MDM2 domain protein                                                                 | LEIAGLSPHFLK<br>LEIAGLSPHFL                                                                                                                       | 26.97~42.08<br>23.09~28.06                                                                                                    | 42.89~78.24<br>37.41~49.38                                                                                                    | 719.44<br>655.36                                                                      | 2<br>2                                    | 1436.87<br>1308.71                                                                             | 1436.84<br>1308.74                                                                          | ±0.04<br>±0.03                                                               | 9<br>6                                                       | 46.12~46.68<br>51.77~52.04                                                                                              | 0.72<br>2.45                                                          | 0.44<br>1.50                                                          |
| Solyc04g014720.2.1     | 60S ribosomal protein L6                                                                 | AVPDLKGYLSARF<br>IKAIEAVPDLKGYLSARF                                                                                                               | 22.52~35.40<br>40.77                                                                                                          | 38.35~42.62<br>48.09                                                                                                          | 718.89<br>664.36                                                                      | 2<br>3                                    | 1435.77<br>1990.05                                                                             | 1435.78<br>1990.13                                                                          | -0.01<br>-0.07                                                               | 7~8<br>17                                                    | 42.27~42.56<br>43.84                                                                                                    | 0.15<br>0.27                                                          | 0.09<br>0.16                                                          |
| Solyc12g099240.1.1     | Huntingtin interacting protein K                                                         | LAAVKINAADIDIANE<br>LAAVKINAADIDIANEL                                                                                                             | 28.91<br>22.38~73.78                                                                                                          | 39.53<br>46.63~86.26                                                                                                          | 877.48<br>934.05                                                                      | 2<br>2                                    | 1752.96<br>1866.09                                                                             | 1752.96<br>1866.05                                                                          | -0.01<br>±0.04                                                               | 8<br>11~12                                                   | 43.82<br>50.69~50.87                                                                                                    | 0.84<br>0.57                                                          | 0.52<br>0.35                                                          |
| Solyc11g012110.1.1     | 60S ribosomal protein L6                                                                 | PELKGYSARF<br>AVPELKGYSARF<br>IKAIEAVPELKGYSARF                                                                                                   | 29.23<br>32.86~40.56<br>30.32~37.44                                                                                           | 46.33<br>44.38~51.03<br>39.62~44.65                                                                                           | 640.86<br>725.88<br>669.06                                                            | 2<br>2<br>3                               | 1279.7<br>1449.75<br>2004.16                                                                   | 1279.69<br>1449.8<br>2004.14                                                                | 0.01<br>±0.05<br>0.02                                                        | 9<br>9~10<br>7                                               | 40.66<br>40.35~40.64<br>43.27                                                                                           | -9999<br>0.37<br>0.02                                                 | -9999 <sup>b</sup><br>0.23<br>0.01                                    |

<sup>a</sup> ratio of the peptide intensity observed in unwounded (UW) and wounded plus MeJA (W) treated plants<sup>b</sup> the peptide was only detected in wounding plus MeJA (W) treated sample (S/N < 10 in unwounded samples)<sup>c</sup> the peptide was only detected in unwounded sample (S/N < 10 in wounded plus MeJA (W) treated sample samples)

**Supplemental Table 2.** Primers used in this study.

| Gene                                                                                | Gene Accession #   | Primer (5'->3')                                                  | Product size (bp) |
|-------------------------------------------------------------------------------------|--------------------|------------------------------------------------------------------|-------------------|
| <i>Elongation Factor 1<math>\alpha</math></i><br>( <i>EF-1<math>\alpha</math></i> ) | X14449             | For: CTCCGTCTTCCACTTCAGG<br>Rev: TCAGTTGTCAAACCAGTAGGG           | 128               |
| <i>Ubiquitin 3</i><br>( <i>Ubi3</i> )                                               | X58523             | For: ACTCTTGCCGACTACAACATCC<br>Rev: CTCCTTACGAAGCCTCTGAACC       | 198               |
| <i>Proteinase Inhibitor 1 (PI-1)</i>                                                | K03290             | For: CTTCTTCCAACCTTCCTTTG<br>Rev: TGTTTTCTTCGCACATC              | 110               |
| <i>Proteinase Inhibitor 2 (PI-2)</i>                                                | K03291             | For: AATTATCCATCATGGCTGTTCAC<br>Rev: CCTTTTTGGATCAGATTCTCCTT     | 254               |
| <i>AvrPto-dependent Pto-interacting protein 3</i><br>( <i>Adi3</i> )                | NM_001247682       | For: AGGCAGTTTCCTATAGGGGCTA<br>Rev: TCGACCATCAGGTCTTCTTCC        | 155               |
| <i>Ethylene response factor 5</i><br>( <i>ERF5</i> )                                | NM_001247583       | For: ATGGGTTCTCCACAAGAGAC<br>Rev: GAAGCTTGCGATGTCATCAA           | 132               |
| <i>Pathogenesis-related protein 1b</i><br>( <i>PR-1b</i> )                          | M69248.1           | For: CTCATATGAGACGTGAGAAAG<br>Rev: GGAAACAAGAAGATGCAGTACTTAA     | 204               |
| <i>beta-1,3-glucanase</i><br>( <i>PR-2</i> )                                        | NM_001247869.1     | For: CAAATAACAGGAGCGCAGCC<br>Rev: GTTACTTCCTTTGAGGGCAT           | 163               |
| <i>Cys protease</i><br>( <i>PR-7</i> )                                              | CK574973.1         | For: TCAGCACCTCTGGACCTTT<br>Rev: GCTCCTGAAGGCTCTGTTA             | 141               |
| <i>Class II chitinase</i><br>( <i>Chi;2</i> )                                       | U30465.1           | For: TTTTGGTCGAGGTCCTATCC<br>Rev: GTAATGACATCGTGTGCCGA           | 186               |
| <i>WRKY transcription factor 53</i><br>( <i>WRKY53</i> )                            | Solyc08g008280.2.1 | For: AAATGGATTGTGCATCAAACCTGGGA<br>Rev: AGCCACCCCAGTTGAGAATCAACA | 189               |
