# Supplementary material
Source: PubMed Central journal article supplement (PMC4247587)
Supplement: supp_tpc.114.131185_tpc131185_SupplementalDS3.pdf [file supp_tpc.114.131185_tpc131185_SupplementalDS3.pdf]

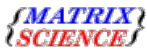

# Mascot Search Results

## Peptide View

MS/MS Fragmentation of **LLYQEPVLGPVR**

Found in **Solyc00g999999**, BetaCasein

Match to Query 4790: 1382.732640 from(692.373596,2+)

Title: cyr\_090306\_meja\_005\_bi9\_2\_p.01809.01809.2\_39.624mins

Data file G:\Processed DATA\mgf\090307\_uniqua\_mgf\MGF\for Merge\merged meja0307 (2).mgf

Click mouse within plot area to zoom in by factor of two about that point

Or,   to  Da

Label all possible matches  Label matches used for scoring

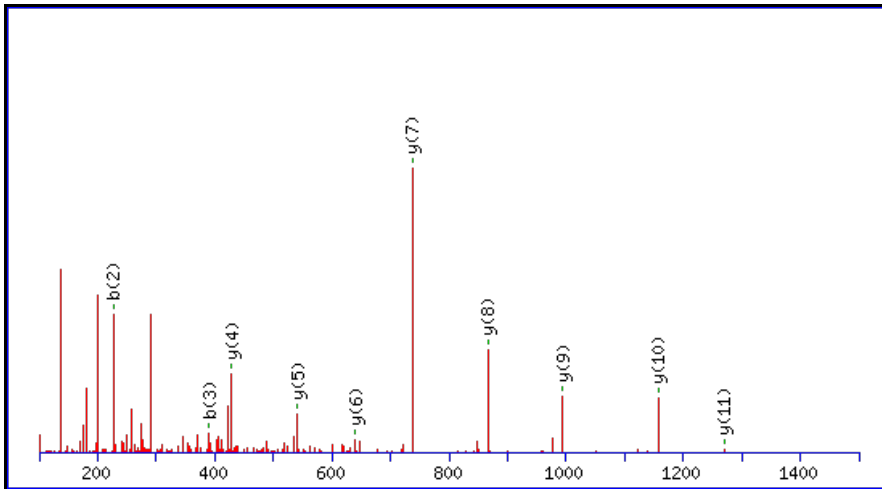

**Monoisotopic mass of neutral peptide Mr(calc):** 1382.79

**Ions Score:** 74 **Expect:** 1.7e-005

**Matches :** 10/104 fragment ions using 12 most intense peaks ([help](#))

| #  | b             | b <sup>++</sup> | b*      | b* <sup>++</sup> | b <sup>0</sup> | b <sup>0++</sup> | Seq. | y              | y <sup>++</sup> | y*      | y* <sup>++</sup> | y <sup>0</sup> | y <sup>0++</sup> | #  |
|----|---------------|-----------------|---------|------------------|----------------|------------------|------|----------------|-----------------|---------|------------------|----------------|------------------|----|
| 1  | 114.09        | 57.55           |         |                  |                |                  | L    |                |                 |         |                  |                |                  | 12 |
| 2  | <b>227.18</b> | 114.09          |         |                  |                |                  | L    | <b>1270.72</b> | 635.86          | 1253.69 | 627.35           | 1252.70        | 626.86           | 11 |
| 3  | <b>390.24</b> | 195.62          |         |                  |                |                  | Y    | <b>1157.63</b> | 579.32          | 1140.60 | 570.81           | 1139.62        | 570.31           | 10 |
| 4  | 518.30        | 259.65          | 501.27  | 251.14           |                |                  | Q    | <b>994.57</b>  | 497.79          | 977.54  | 489.27           | 976.56         | 488.78           | 9  |
| 5  | 647.34        | 324.17          | 630.31  | 315.66           | 629.33         | 315.17           | E    | <b>866.51</b>  | 433.76          | 849.48  | 425.25           | 848.50         | 424.75           | 8  |
| 6  | 744.39        | 372.70          | 727.37  | 364.19           | 726.38         | 363.69           | P    | <b>737.47</b>  | 369.24          | 720.44  | 360.72           |                |                  | 7  |
| 7  | 843.46        | 422.23          | 826.43  | 413.72           | 825.45         | 413.23           | V    | <b>640.41</b>  | 320.71          | 623.39  | 312.20           |                |                  | 6  |
| 8  | 956.55        | 478.78          | 939.52  | 470.26           | 938.53         | 469.77           | L    | <b>541.35</b>  | 271.18          | 524.32  | 262.66           |                |                  | 5  |
| 9  | 1013.57       | 507.29          | 996.54  | 498.77           | 995.56         | 498.28           | G    | <b>428.26</b>  | 214.63          | 411.24  | 206.12           |                |                  | 4  |
| 10 | 1110.62       | 555.81          | 1093.59 | 547.30           | 1092.61        | 546.81           | P    | 371.24         | 186.12          | 354.21  | 177.61           |                |                  | 3  |
| 11 | 1209.69       | 605.35          | 1192.66 | 596.83           | 1191.68        | 596.34           | V    | 274.19         | 137.60          | 257.16  | 129.08           |                |                  | 2  |
| 12 |               |                 |         |                  |                |                  | R    | 175.12         | 88.06           | 158.09  | 79.55            |                |                  | 1  |

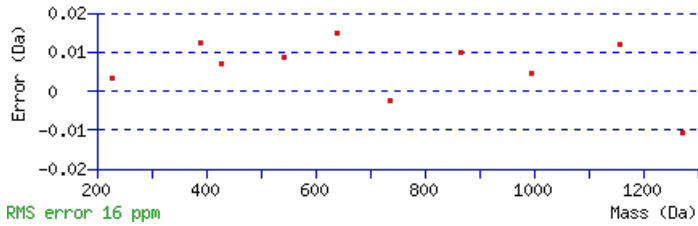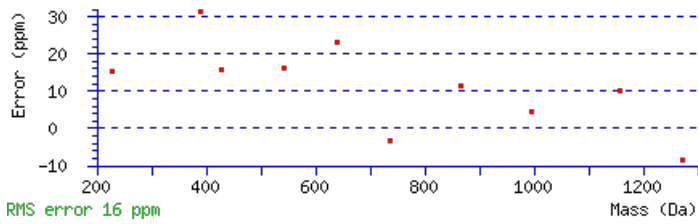

NCBI **BLAST** search of [LLYQEPVLGPVR](#)

(Parameters: blastp, nr protein database, expect=20000, no filter, PAM30)

Other BLAST [web gateways](#)

### All matches to this query

| Score | Mr(calc): | Delta | Sequence                       |
|-------|-----------|-------|--------------------------------|
| 74.1  | 1382.79   | -0.06 | <a href="#">LLYQEPVLGPVR</a>   |
| 15.8  | 1382.72   | 0.01  | <a href="#">IYYQALFWTASA</a>   |
| 15.8  | 1382.68   | 0.05  | <a href="#">LLEDNPPKYHA</a>    |
| 12.5  | 1382.76   | -0.02 | <a href="#">ALFADEPVVVARP</a>  |
| 10.9  | 1382.77   | -0.03 | <a href="#">IFEQLLARHEK</a>    |
| 10.8  | 1382.78   | -0.05 | <a href="#">ILYPLSIHLSLD</a>   |
| 9.8   | 1382.72   | 0.02  | <a href="#">ELPRLQEKDQQ</a>    |
| 9.3   | 1382.69   | 0.04  | <a href="#">WSGPLVEPASAGGR</a> |
| 7.0   | 1382.78   | -0.04 | <a href="#">LLKKNTPASPDTV</a>  |
| 7.0   | 1382.74   | -0.01 | <a href="#">LTREIDDLPSPK</a>   |

Mascot: <http://www.matrixscience.com/>

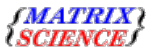

# Mascot Search Results

## Peptide View

MS/MS Fragmentation of **AVQSKPPSKRDPPKMQTD**

Found in **Solyc05g051750.2.1**, genomic\_reference:SL2.40ch05 gene\_region:61277162-61281598  
transcript\_region:SL2.40ch05:61277162..61281598- functional\_description: ""Prosystemin (AHRD V1 \*\*\*-  
Q5MBK9\_BETVU); contains Interpro domain(s) IPR009966 Prosystemin ""

Match to Query 11574: 2009.072240 from(1005.543396,2+)

Title: cyr\_090307\_meja\_05\_2\_bi3\_p.00991.00991.2\_21.524mins

Data file G:\Processed DATA\mgf\090307\_uniqua\_mgf\MGF\for Merge\merged meja0307 (2).mgf

Click mouse within plot area to zoom in by factor of two about that point

Or,   to  Da

Label all possible matches  Label matches used for scoring

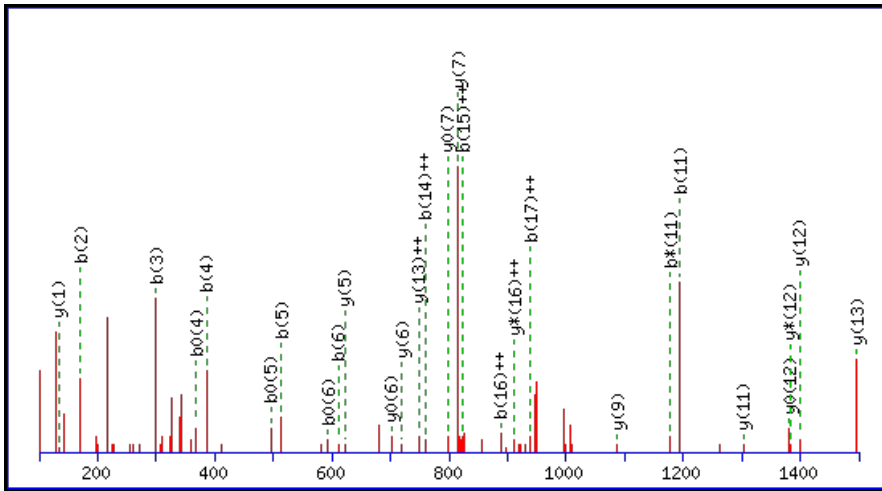

**Monoisotopic mass of neutral peptide Mr(calc):** 2009.04

**Ions Score:** 38 **Expect:** 0.05

**Matches :** 28/190 fragment ions using 61 most intense peaks ([help](#))

| #  | b              | b <sup>++</sup> | b <sup>*</sup> | b <sup>*++</sup> | b <sup>0</sup> | b <sup>0++</sup> | Seq. | y              | y <sup>++</sup> | y <sup>*</sup> | y <sup>*++</sup> | y <sup>0</sup> | y <sup>0++</sup> | #  |
|----|----------------|-----------------|----------------|------------------|----------------|------------------|------|----------------|-----------------|----------------|------------------|----------------|------------------|----|
| 1  | 72.04          | 36.53           |                |                  |                |                  | A    |                |                 |                |                  |                |                  | 18 |
| 2  | <b>171.11</b>  | 86.06           |                |                  |                |                  | V    | 1939.01        | 970.01          | 1921.98        | 961.49           | 1921.00        | 961.00           | 17 |
| 3  | <b>299.17</b>  | 150.09          | 282.14         | 141.58           |                |                  | Q    | 1839.94        | 920.47          | 1822.91        | <b>911.96</b>    | 1821.93        | 911.47           | 16 |
| 4  | <b>386.20</b>  | 193.61          | 369.18         | 185.09           | <b>368.19</b>  | 184.60           | S    | 1711.88        | 856.44          | 1694.85        | 847.93           | 1693.87        | 847.44           | 15 |
| 5  | <b>514.30</b>  | 257.65          | 497.27         | 249.14           | <b>496.29</b>  | 248.65           | K    | 1624.85        | 812.93          | 1607.82        | 804.41           | 1606.84        | 803.92           | 14 |
| 6  | <b>611.35</b>  | 306.18          | 594.32         | 297.67           | <b>593.34</b>  | 297.17           | P    | <b>1496.75</b> | <b>748.88</b>   | 1479.73        | 740.37           | 1478.74        | 739.87           | 13 |
| 7  | 708.40         | 354.71          | 691.38         | 346.19           | 690.39         | 345.70           | P    | <b>1399.70</b> | 700.35          | <b>1382.67</b> | 691.84           | <b>1381.69</b> | 691.35           | 12 |
| 8  | 795.44         | 398.22          | 778.41         | 389.71           | 777.43         | 389.22           | S    | <b>1302.65</b> | 651.83          | 1285.62        | 643.31           | 1284.64        | 642.82           | 11 |
| 9  | 923.53         | 462.27          | 906.50         | 453.76           | 905.52         | 453.26           | K    | 1215.62        | 608.31          | 1198.59        | 599.80           | 1197.60        | 599.31           | 10 |
| 10 | 1079.63        | 540.32          | 1062.61        | 531.81           | 1061.62        | 531.31           | R    | <b>1087.52</b> | 544.26          | 1070.49        | 535.75           | 1069.51        | 535.26           | 9  |
| 11 | <b>1194.66</b> | 597.83          | <b>1177.63</b> | 589.32           | 1176.65        | 588.83           | D    | 931.42         | 466.21          | 914.39         | 457.70           | 913.41         | 457.21           | 8  |
| 12 | 1291.71        | 646.36          | 1274.69        | 637.85           | 1273.70        | 637.35           | P    | <b>816.39</b>  | 408.70          | 799.37         | 400.19           | <b>798.38</b>  | 399.69           | 7  |
| 13 | 1388.76        | 694.89          | 1371.74        | 686.37           | 1370.75        | 685.88           | P    | <b>719.34</b>  | 360.17          | 702.31         | 351.66           | <b>701.33</b>  | 351.17           | 6  |

|    |         |        |         |        |         |        |   |        |        |        |        |        |        |   |
|----|---------|--------|---------|--------|---------|--------|---|--------|--------|--------|--------|--------|--------|---|
| 14 | 1516.86 | 758.93 | 1499.83 | 750.42 | 1498.85 | 749.93 | K | 622.29 | 311.65 | 605.26 | 303.13 | 604.28 | 302.64 | 5 |
| 15 | 1647.90 | 824.45 | 1630.87 | 815.94 | 1629.89 | 815.45 | M | 494.19 | 247.60 | 477.16 | 239.09 | 476.18 | 238.59 | 4 |
| 16 | 1775.96 | 888.48 | 1758.93 | 879.97 | 1757.95 | 879.48 | Q | 363.15 | 182.08 | 346.12 | 173.57 | 345.14 | 173.07 | 3 |
| 17 | 1877.01 | 939.01 | 1859.98 | 930.49 | 1859.00 | 930.00 | T | 235.09 | 118.05 |        |        | 217.08 | 109.04 | 2 |
| 18 |         |        |         |        |         |        | D | 134.04 | 67.53  |        |        | 116.03 | 58.52  | 1 |

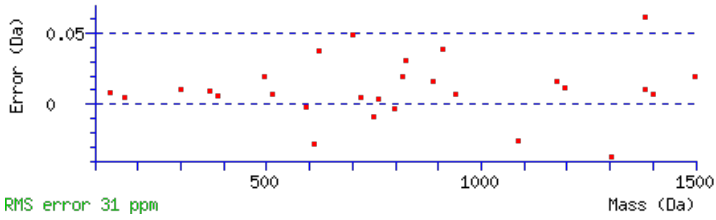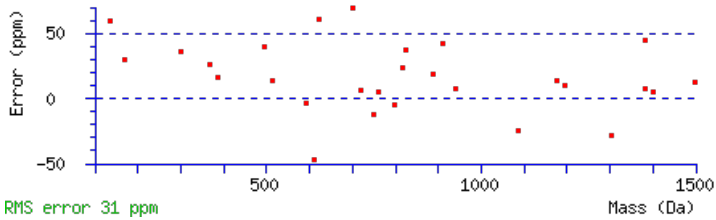

NCBI BLAST search of [AVQSKPPSKRDPPKMOTD](#)  
 (Parameters: blastp, nr protein database, expect=20000, no filter, PAM30)  
 Other BLAST [web gateways](#)

#### All matches to this query

| Score | Mr(calc): | Delta | Sequence                            |
|-------|-----------|-------|-------------------------------------|
| 38.2  | 2009.04   | 0.04  | <a href="#">AVQSKPPSKRDPPKMOTD</a>  |
| 16.8  | 2009.15   | -0.08 | <a href="#">QGISKLQPOISAKVVALTE</a> |
| 6.3   | 2009.03   | 0.04  | <a href="#">XMRELQRSRSSAPQNPR</a>   |
| 5.2   | 2009.10   | -0.03 | <a href="#">KGVTAGDLHKALLSIPSSC</a> |
| 4.4   | 2009.11   | -0.04 | <a href="#">RNSRRSPSRKSPKPRN</a>    |
| 2.4   | 2009.07   | 0.01  | <a href="#">NLTVIVICFSPDPPRIE</a>   |
| 1.1   | 2008.99   | 0.08  | <a href="#">VKASQARNSFQKVMNNGM</a>  |
| 1.1   | 2009.07   | 0.00  | <a href="#">GIDLPPFAKSAPASPTRER</a> |
| 1.1   | 2008.99   | 0.08  | <a href="#">PYKIGAADMDFLNELOK</a>   |
| 0.9   | 2009.05   | 0.02  | <a href="#">EEVRPKDHAECKRLATK</a>   |

Mascot: <http://www.matrixscience.com/>

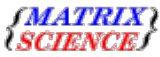

# Mascot Search Results

## Peptide View

### MS/MS Fragmentation of **VSNFDPVKR**

Found in **Solyc05g025600.1.1**, evidence\_code:10F1H0E1IEG genomic\_reference:SL2.40ch05  
 gene\_region:34412777-34413112 transcript\_region:SL2.40ch05:34412777..34413112-  
 go\_terms:GO:0016020 functional\_description:""Chloroplast photosystem II subunit X (Fragment)  
 (AHRD V1 \*\*\*- B1PPX5\_9M

Match to Query 1777: 1060.554052 from(531.284302,2+)

Title: cyr\_090307\_maja\_05\_2\_bi4\_p.01162.01162.2\_26.161mins

Data file G:\Processed DATA\mgf\090307\_uniqua\_mgf\MGF\for Merge\merged maja0307 (2).mgf

Click mouse within plot area to zoom in by factor of two about that point

Or,   to  Da

Label all possible matches  Label matches used for scoring

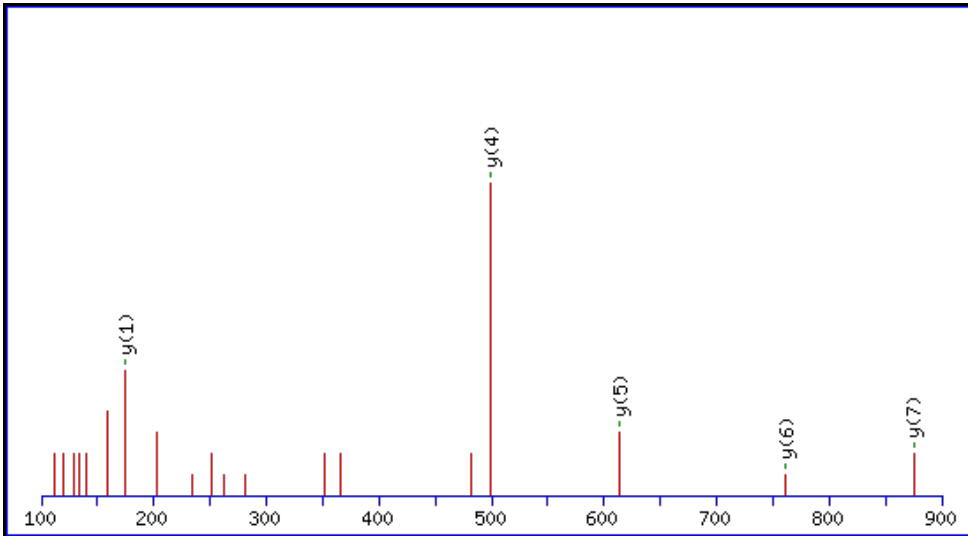

**Monoisotopic mass of neutral peptide Mr(calc):** 1060.57

**Ions Score:** 41 **Expect:** 0.055

**Matches :** 5/82 fragment ions using 7 most intense peaks ([help](#))

| # | b      | b <sup>++</sup> | b*     | b <sup>*++</sup> | b <sup>0</sup> | b <sup>0++</sup> | Seq. | y      | y <sup>++</sup> | y*     | y <sup>*++</sup> | y <sup>0</sup> | y <sup>0++</sup> | # |
|---|--------|-----------------|--------|------------------|----------------|------------------|------|--------|-----------------|--------|------------------|----------------|------------------|---|
| 1 | 100.08 | 50.54           |        |                  |                |                  | V    |        |                 |        |                  |                |                  | 9 |
| 2 | 187.11 | 94.06           |        |                  | 169.10         | 85.05            | S    | 962.51 | 481.76          | 945.48 | 473.24           | 944.49         | 472.75           | 8 |
| 3 | 301.15 | 151.08          | 284.12 | 142.57           | 283.14         | 142.07           | N    | 875.47 | 438.24          | 858.45 | 429.73           | 857.46         | 429.24           | 7 |
| 4 | 448.22 | 224.61          | 431.19 | 216.10           | 430.21         | 215.61           | F    | 761.43 | 381.22          | 744.40 | 372.71           | 743.42         | 372.21           | 6 |
| 5 | 563.25 | 282.13          | 546.22 | 273.61           | 545.24         | 273.12           | D    | 614.36 | 307.68          | 597.34 | 299.17           | 596.35         | 298.68           | 5 |
| 6 | 660.30 | 330.65          | 643.27 | 322.14           | 642.29         | 321.65           | P    | 499.34 | 250.17          | 482.31 | 241.66           |                |                  | 4 |
| 7 | 759.37 | 380.19          | 742.34 | 371.67           | 741.36         | 371.18           | V    | 402.28 | 201.64          | 385.26 | 193.13           |                |                  | 3 |
| 8 | 887.46 | 444.23          | 870.44 | 435.72           | 869.45         | 435.23           | K    | 303.21 | 152.11          | 286.19 | 143.60           |                |                  | 2 |

|   |  |  |  |  |  |   |        |       |        |       |  |  |   |
|---|--|--|--|--|--|---|--------|-------|--------|-------|--|--|---|
| 9 |  |  |  |  |  | R | 175.12 | 88.06 | 158.09 | 79.55 |  |  | 1 |
|---|--|--|--|--|--|---|--------|-------|--------|-------|--|--|---|

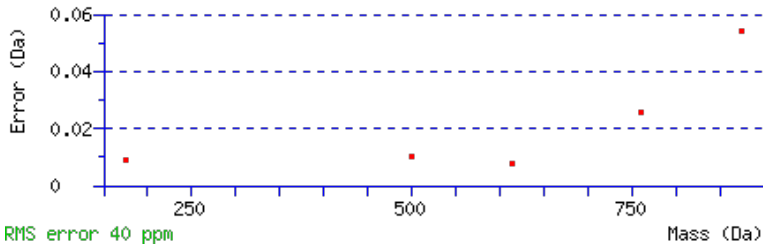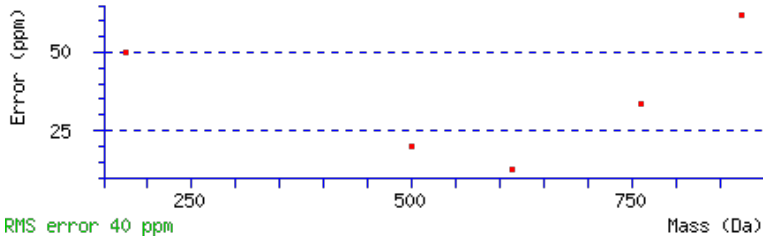

NCBI **BLAST** search of [VSNFDPVKR](#)

(Parameters: blastp, nr protein database, expect=20000, no filter, PAM30)

Other BLAST [web gateways](#)

### All matches to this query

| Score | Mr(calc): | Delta | Sequence                      |
|-------|-----------|-------|-------------------------------|
| 40.7  | 1060.57   | -0.01 | <a href="#">VSNFDPVKR</a>     |
| 19.0  | 1060.58   | -0.03 | <a href="#">WNFPRKTL</a>      |
| 11.8  | 1060.53   | 0.02  | <a href="#">WNFLLPNSA</a>     |
| 10.3  | 1060.52   | 0.04  | <a href="#">AGGDFAAPT VVG</a> |
| 9.9   | 1060.52   | 0.03  | <a href="#">WNDVCLRR</a>      |
| 9.9   | 1060.51   | 0.05  | <a href="#">WNNPLDFR</a>      |
| 9.0   | 1060.49   | 0.06  | <a href="#">AAQVEDSWR</a>     |
| 9.0   | 1060.59   | -0.03 | <a href="#">VLSAKDSVSR</a>    |
| 8.8   | 1060.50   | 0.05  | <a href="#">DARRGESDR</a>     |
| 8.1   | 1060.58   | -0.03 | <a href="#">WNEGLRVLG</a>     |

**Mascot:** <http://www.matrixscience.com/>

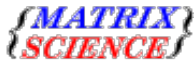

# Mascot Search Results

## Peptide View

### MS/MS Fragmentation of **PVGNWIGQRPY**

Found in **Solyc00g174340.1.1**, evidence\_code:10F1H1E1IEG

genomic\_reference:SL2.40ch00 gene\_region:18121213-18121692

transcript\_region:SL2.40ch00:18121213..18121692- go\_terms:GO:0005515

functional\_description:""Pathogenesis-related protein 1b (AHRD V1 \*\*\*-Q941G6\_SOLTU); contains I

Match to Query 3794: 1285.702244 from(643.858398,2+)

Title: cyr\_090307\_meja\_05\_2\_bi10\_p.01776.01776.2\_36.844mins

Data file G:\Processed DATA\mgf090307\_uniqua\_mgf\MGF\for Merge\merged meja0307 (2).mgf

Click mouse within plot area to zoom in by factor of two about that point

Or,   to  Da

Label all possible matches  Label matches used for scoring

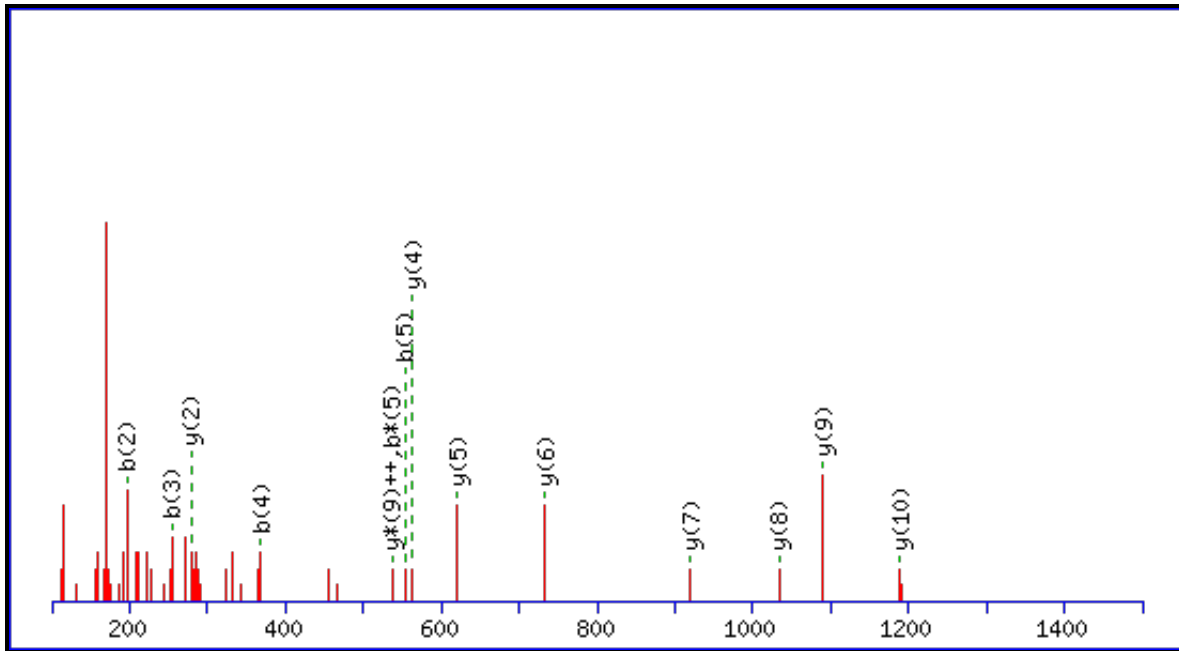

**Monoisotopic mass of neutral peptide Mr(calc):** 1285.66

**Ions Score:** 53 **Expect:** 0.0024

**Matches :** 14/70 fragment ions using 24 most intense peaks ([help](#))

| # | b     | b <sup>++</sup> | b <sup>*</sup> | b <sup>*++</sup> | Seq. | y | y <sup>++</sup> | y <sup>*</sup> | y <sup>*++</sup> | #  |
|---|-------|-----------------|----------------|------------------|------|---|-----------------|----------------|------------------|----|
| 1 | 98.06 | 49.53           |                |                  | P    |   |                 |                |                  | 11 |

|    |         |        |         |        |   |         |        |         |        |    |
|----|---------|--------|---------|--------|---|---------|--------|---------|--------|----|
| 2  | 197.13  | 99.07  |         |        | V | 1189.61 | 595.31 | 1172.58 | 586.80 | 10 |
| 3  | 254.15  | 127.58 |         |        | G | 1090.54 | 545.78 | 1073.52 | 537.26 | 9  |
| 4  | 368.19  | 184.60 | 351.17  | 176.09 | N | 1033.52 | 517.26 | 1016.49 | 508.75 | 8  |
| 5  | 554.27  | 277.64 | 537.25  | 269.13 | W | 919.48  | 460.24 | 902.45  | 451.73 | 7  |
| 6  | 667.36  | 334.18 | 650.33  | 325.67 | I | 733.40  | 367.20 | 716.37  | 358.69 | 6  |
| 7  | 724.38  | 362.69 | 707.35  | 354.18 | G | 620.32  | 310.66 | 603.29  | 302.15 | 5  |
| 8  | 852.44  | 426.72 | 835.41  | 418.21 | Q | 563.29  | 282.15 | 546.27  | 273.64 | 4  |
| 9  | 1008.54 | 504.77 | 991.51  | 496.26 | R | 435.24  | 218.12 | 418.21  | 209.61 | 3  |
| 10 | 1105.59 | 553.30 | 1088.56 | 544.79 | P | 279.13  | 140.07 |         |        | 2  |
| 11 |         |        |         |        | Y | 182.08  | 91.54  |         |        | 1  |

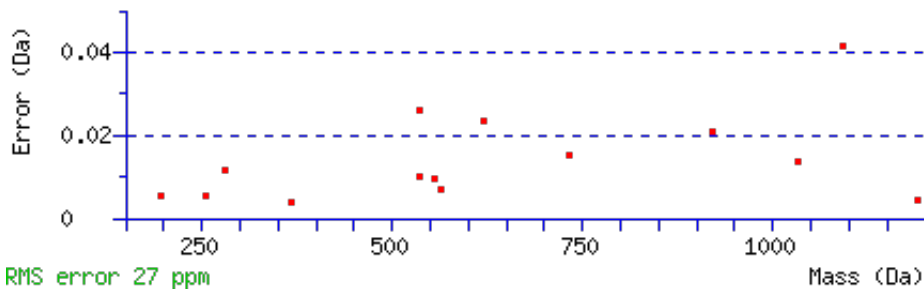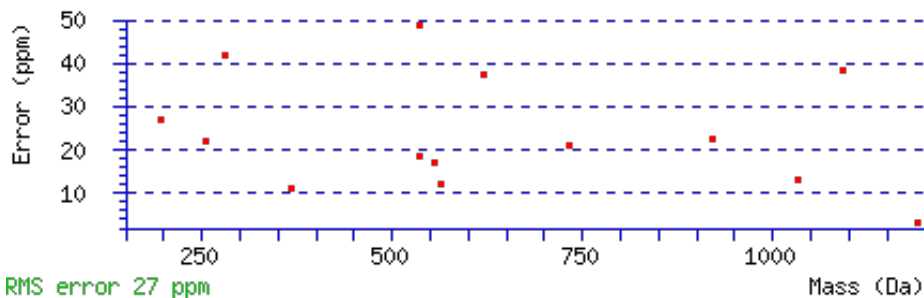

NCBI **BLAST** search of [PVGNWIGORPY](#)

(Parameters: blastp, nr protein database, expect=20000, no filter, PAM30)

Other BLAST [web gateways](#)

### All matches to this query

| Score | Mr(calc): | Delta | Sequence                      |
|-------|-----------|-------|-------------------------------|
| 53.4  | 1285.66   | 0.05  | <a href="#">PVGNWIGORPY</a>   |
| 11.5  | 1285.69   | 0.01  | <a href="#">ETHSVILLDLF</a>   |
| 4.4   | 1285.63   | 0.07  | <a href="#">PGVVDAQVNLATX</a> |
| 4.2   | 1285.64   | 0.06  | <a href="#">LTGEKFRSPDH</a>   |
| 3.8   | 1285.77   | -0.07 | <a href="#">KGRIVKTGDISI</a>  |



|     |         |       |                               |
|-----|---------|-------|-------------------------------|
| 3.4 | 1285.72 | -0.02 | <a href="#">RNPSLLKNMTL</a>   |
| 2.8 | 1285.71 | -0.01 | <a href="#">LPLRVSGPVDHP</a>  |
| 2.0 | 1285.64 | 0.06  | <a href="#">VPGTRKQEWDA</a>   |
| 1.3 | 1285.67 | 0.03  | <a href="#">NGLAVVIICAQAD</a> |
| 1.1 | 1285.64 | 0.06  | <a href="#">NADRPLLCNLAS</a>  |

**Mascot:** <http://www.matrixscience.com/>



# Mascot Search Results

## Peptide View

### MS/MS Fragmentation of **KFVENAATSFSI**

Found in **Solyc07g044860.2.1**, genomic\_reference:SL2.40ch07 gene\_region:55244985-55247025 transcript\_region:SL2.40ch07:55244985..55247025- go\_terms:GO:0008266 functional\_description:""Oxygen-evolving enhancer protein 2, chloroplastic (AHRD V1 \*\*\*- PSBP\_SOLLC); contains Interpro do

Match to Query 4138: 1312.692358 from(657.353455,2+)

Title: cyr\_090307\_meja\_05\_2\_bi5\_p.01704.01704.2\_40.196mins

Data file G:\Processed DATA\mgf\090307\_uniqua\_mgf\MGF\for Merge\merged meja0307 (2).mgf

Click mouse within plot area to zoom in by factor of two about that point

Or,   to  Da

Label all possible matches  Label matches used for scoring

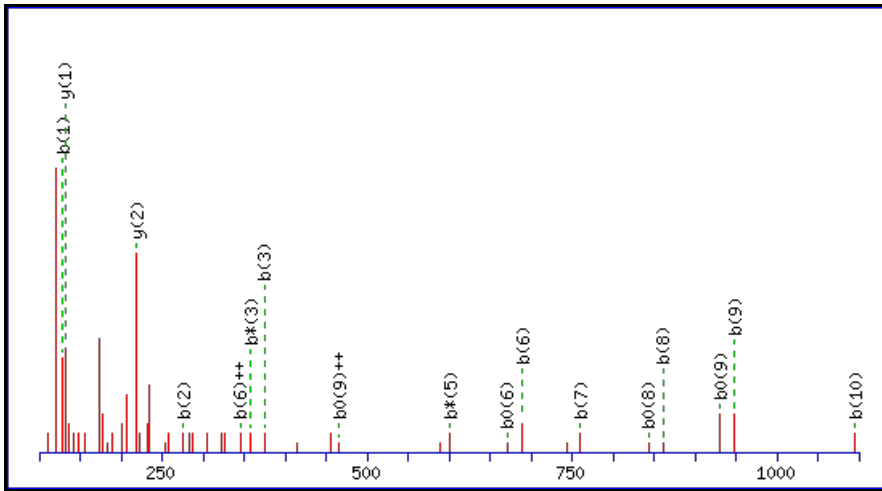

**Monoisotopic mass of neutral peptide Mr(calc):** 1312.67

**Ions Score:** 49 **Expect:** 0.006

**Matches :** 17/110 fragment ions using 31 most intense peaks ([help](#))

| #  | b              | b <sup>++</sup> | b <sup>*</sup> | b <sup>*++</sup> | b <sup>0</sup> | b <sup>0++</sup> | Seq.     | y             | y <sup>++</sup> | y <sup>*</sup> | y <sup>*++</sup> | y <sup>0</sup> | y <sup>0++</sup> | #         |
|----|----------------|-----------------|----------------|------------------|----------------|------------------|----------|---------------|-----------------|----------------|------------------|----------------|------------------|-----------|
| 1  | <b>129.10</b>  | 65.05           | 112.08         | 56.54            |                |                  | <b>K</b> |               |                 |                |                  |                |                  | <b>12</b> |
| 2  | <b>276.17</b>  | 138.59          | 259.14         | 130.08           |                |                  | <b>F</b> | 1185.58       | 593.29          | 1168.55        | 584.78           | 1167.57        | 584.29           | <b>11</b> |
| 3  | <b>375.24</b>  | 188.12          | <b>358.21</b>  | 179.61           |                |                  | <b>V</b> | 1038.51       | 519.76          | 1021.48        | 511.25           | 1020.50        | 510.75           | <b>10</b> |
| 4  | 504.28         | 252.64          | 487.26         | 244.13           | 486.27         | 243.64           | <b>E</b> | 939.44        | 470.22          | 922.42         | 461.71           | 921.43         | 461.22           | <b>9</b>  |
| 5  | 618.32         | 309.67          | <b>601.30</b>  | 301.15           | 600.31         | 300.66           | <b>N</b> | 810.40        | 405.70          | 793.37         | 397.19           | 792.39         | 396.70           | <b>8</b>  |
| 6  | <b>689.36</b>  | <b>345.18</b>   | 672.34         | 336.67           | <b>671.35</b>  | 336.18           | <b>A</b> | 696.36        | 348.68          |                |                  | 678.35         | 339.68           | <b>7</b>  |
| 7  | <b>760.40</b>  | 380.70          | 743.37         | 372.19           | 742.39         | 371.70           | <b>A</b> | 625.32        | 313.16          |                |                  | 607.31         | 304.16           | <b>6</b>  |
| 8  | <b>861.45</b>  | 431.23          | 844.42         | 422.71           | <b>843.44</b>  | 422.22           | <b>T</b> | 554.28        | 277.64          |                |                  | 536.27         | 268.64           | <b>5</b>  |
| 9  | <b>948.48</b>  | 474.74          | 931.45         | 466.23           | <b>930.47</b>  | <b>465.74</b>    | <b>S</b> | 453.23        | 227.12          |                |                  | 435.22         | 218.12           | <b>4</b>  |
| 10 | <b>1095.55</b> | 548.28          | 1078.52        | 539.76           | 1077.54        | 539.27           | <b>F</b> | 366.20        | 183.60          |                |                  | 348.19         | 174.60           | <b>3</b>  |
| 11 | 1182.58        | 591.79          | 1165.55        | 583.28           | 1164.57        | 582.79           | <b>S</b> | <b>219.13</b> | 110.07          |                |                  | 201.12         | 101.07           | <b>2</b>  |
| 12 |                |                 |                |                  |                |                  | <b>I</b> | <b>132.10</b> | 66.55           |                |                  |                |                  | <b>1</b>  |

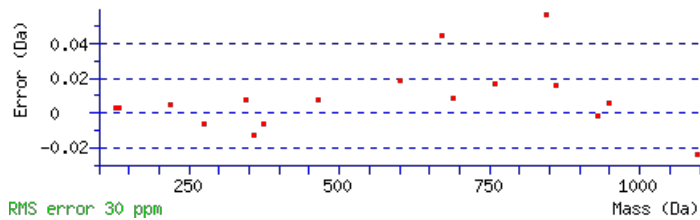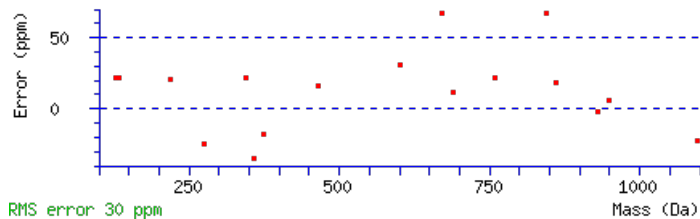

NCBI **BLAST** search of [KFVENAATSFSI](#)

(Parameters: blastp, nr protein database, expect=20000, no filter, PAM30)

Other BLAST [web gateways](#)

### All matches to this query

| Score | Mr(calc): | Delta | Sequence                      |
|-------|-----------|-------|-------------------------------|
| 49.4  | 1312.67   | 0.03  | <a href="#">KFVENAATSFSI</a>  |
| 10.2  | 1312.63   | 0.06  | <a href="#">SNFYINLNEVT</a>   |
| 10.1  | 1312.63   | 0.06  | <a href="#">TLCTNLGGTSFIS</a> |
| 9.2   | 1312.66   | 0.03  | <a href="#">GDKINPNATPSSL</a> |
| 8.5   | 1312.65   | 0.05  | <a href="#">FSFASVWNGVVT</a>  |
| 8.2   | 1312.73   | -0.04 | <a href="#">IDHVKSKMRSI</a>   |
| 8.2   | 1312.71   | -0.02 | <a href="#">ATRYSKQLFSI</a>   |
| 7.5   | 1312.75   | -0.06 | <a href="#">PRLPKPASTFSL</a>  |
| 7.1   | 1312.67   | 0.03  | <a href="#">KLDGDYQKFLS</a>   |
| 6.9   | 1312.70   | -0.01 | <a href="#">FVHADTGEVLII</a>  |

**Mascot:** <http://www.matrixscience.com/>



# Mascot Search Results

## Peptide View

### MS/MS Fragmentation of **ASLFLHVQKNK**

Found in **Solyc01g007350.2.1**, genomic\_reference:SL2.40ch01 gene\_region:1856314-1857063

transcript\_region:SL2.40ch01:1856314..1857063+ go\_terms:GO:0009522

functional\_description:""Photosystem I reaction center subunit VIII (AHRD V1 \*-\*- Q3V525\_ACOCL);

contains Interpro domain(s)

Match to Query 3731: 1283.748388 from(642.881470,2+)

Title: cyr\_090307\_meja\_05\_2\_bi4\_p.01271.01271.2\_29.038mins

Data file G:\Processed DATA\mgf\090307\_uniqua\_mgf\MGF\for Merge\merged meja0307 (2).mgf

Click mouse within plot area to zoom in by factor of two about that point

Or,   to  Da

Label all possible matches  Label matches used for scoring

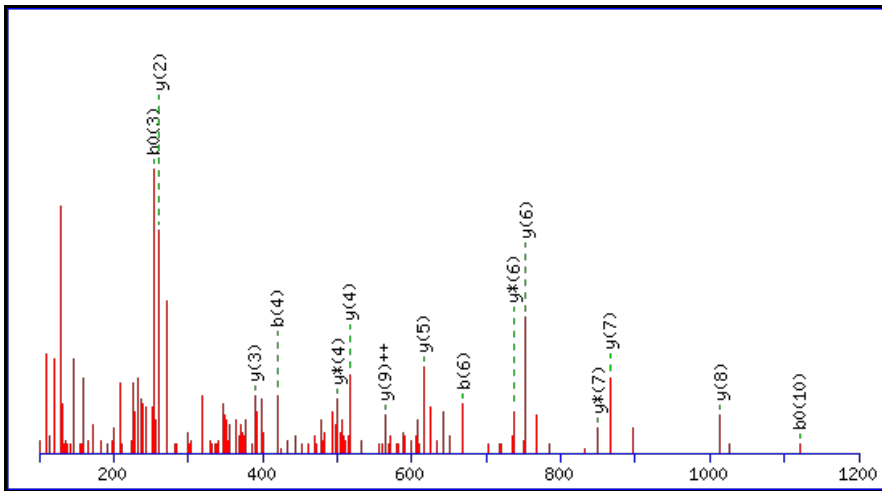

**Monoisotopic mass of neutral peptide Mr(calc):** 1283.73

**Ions Score:** 57 **Expect:** 0.00068

**Matches :** 15/86 fragment ions using 19 most intense peaks ([help](#))

| #  | b       | b <sup>++</sup> | b*      | b <sup>*++</sup> | b <sup>0</sup> | b <sup>0++</sup> | Seq. | y       | y <sup>++</sup> | y*      | y <sup>*++</sup> | y <sup>0</sup> | y <sup>0++</sup> | #  |
|----|---------|-----------------|---------|------------------|----------------|------------------|------|---------|-----------------|---------|------------------|----------------|------------------|----|
| 1  | 72.04   | 36.53           |         |                  |                |                  | A    |         |                 |         |                  |                |                  | 11 |
| 2  | 159.08  | 80.04           |         |                  | 141.07         | 71.04            | S    | 1213.71 | 607.36          | 1196.68 | 598.84           | 1195.69        | 598.35           | 10 |
| 3  | 272.16  | 136.58          |         |                  | 254.15         | 127.58           | L    | 1126.67 | 563.84          | 1109.65 | 555.33           |                |                  | 9  |
| 4  | 419.23  | 210.12          |         |                  | 401.22         | 201.11           | F    | 1013.59 | 507.30          | 996.56  | 498.78           |                |                  | 8  |
| 5  | 532.31  | 266.66          |         |                  | 514.30         | 257.65           | L    | 866.52  | 433.76          | 849.49  | 425.25           |                |                  | 7  |
| 6  | 669.37  | 335.19          |         |                  | 651.36         | 326.18           | H    | 753.44  | 377.22          | 736.41  | 368.71           |                |                  | 6  |
| 7  | 768.44  | 384.72          |         |                  | 750.43         | 375.72           | V    | 616.38  | 308.69          | 599.35  | 300.18           |                |                  | 5  |
| 8  | 896.50  | 448.75          | 879.47  | 440.24           | 878.49         | 439.75           | Q    | 517.31  | 259.16          | 500.28  | 250.64           |                |                  | 4  |
| 9  | 1024.59 | 512.80          | 1007.57 | 504.29           | 1006.58        | 503.80           | K    | 389.25  | 195.13          | 372.22  | 186.62           |                |                  | 3  |
| 10 | 1138.64 | 569.82          | 1121.61 | 561.31           | 1120.63        | 560.82           | N    | 261.16  | 131.08          | 244.13  | 122.57           |                |                  | 2  |
| 11 |         |                 |         |                  |                |                  | K    | 147.11  | 74.06           | 130.09  | 65.55            |                |                  | 1  |

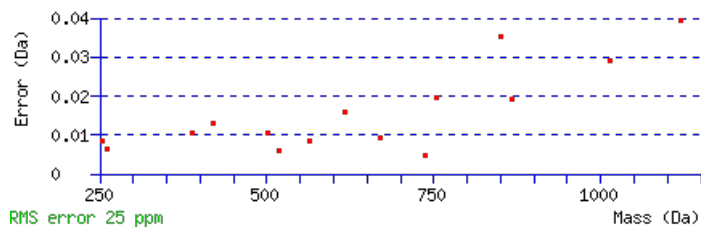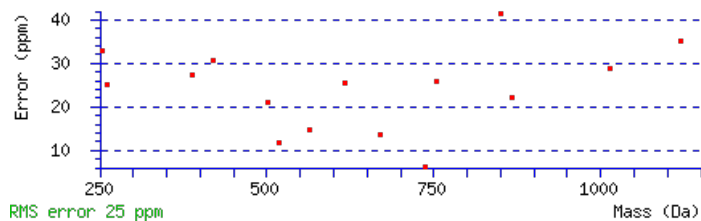

NCBI **BLAST** search of [ASLFLHVQKNK](#)

(Parameters: blastp, nr protein database, expect=20000, no filter, PAM30)

Other BLAST [web gateways](#)

### All matches to this query

| Score | Mr(calc): | Delta | Sequence                     |
|-------|-----------|-------|------------------------------|
| 56.9  | 1283.73   | 0.01  | <a href="#">ASLFLHVQKNK</a>  |
| 18.3  | 1283.66   | 0.09  | <a href="#">LFFTGCVKAGLE</a> |
| 13.7  | 1283.66   | 0.09  | <a href="#">KQLFVHVNADN</a>  |
| 12.0  | 1283.72   | 0.03  | <a href="#">SPSRLNIQKEL</a>  |
| 9.8   | 1283.80   | -0.06 | <a href="#">DRLKRKVKEL</a>   |
| 9.4   | 1283.76   | -0.01 | <a href="#">EAAQVKIREIK</a>  |
| 8.8   | 1283.70   | 0.05  | <a href="#">XMVAKVSHKLG</a>  |
| 8.1   | 1283.75   | -0.00 | <a href="#">TVALTPIVATWI</a> |
| 7.8   | 1283.79   | -0.04 | <a href="#">LFQKVIVEVLP</a>  |
| 7.4   | 1283.69   | 0.06  | <a href="#">LFQLHEQKIE</a>   |

**Mascot:** <http://www.matrixscience.com/>



# Mascot Search Results

## Peptide View

### MS/MS Fragmentation of **LGDPTTKRQAA**

Found in **Solyc12g035280.1.1**, evidence\_code:10F0H1E0IEG genomic\_reference:SL2.40ch12

gene\_region:24188931-24194609 transcript\_region:SL2.40ch12:24188931..24194609-

go\_terms:GO:0003676,GO:0016020,GO:0000166 functional\_description:""Photosystem II CP47 chlorophyll apoprotein (AHRD

Match to Query 2439: 1156.646580 from(579.330566,2+)

Title: cyr\_090307\_meja\_05\_2\_bi4\_p.00982.00982.2\_21.468mins

Data file G:\Processed DATA\mgf\090307\_uniqua\_mgf\MGF\for Merge\merged meja0307 (2).mgf

Click mouse within plot area to zoom in by factor of two about that point

Or,   to  Da

Label all possible matches  Label matches used for scoring

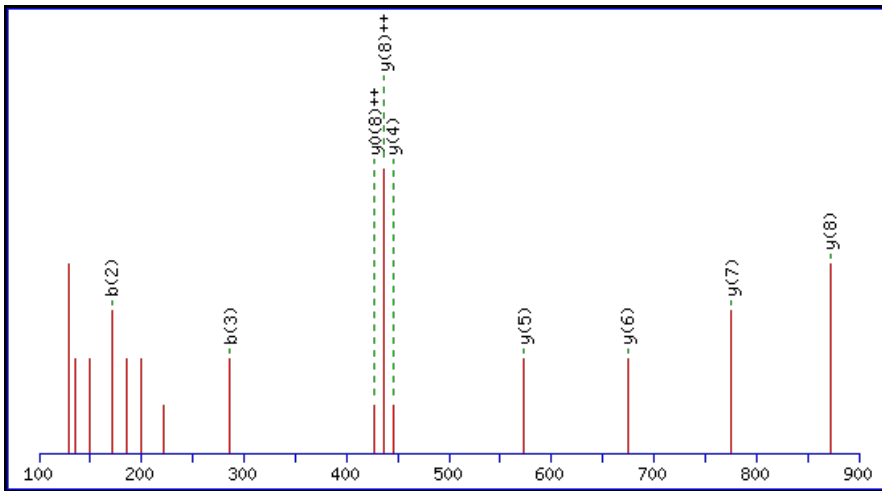

**Monoisotopic mass of neutral peptide Mr(calc):** 1156.62

**Ions Score:** 46 **Expect:** 0.017

**Matches :** 9/90 fragment ions using 10 most intense peaks ([help](#))

| #  | b             | b <sup>++</sup> | b*      | b <sup>*++</sup> | b <sup>0</sup> | b <sup>0++</sup> | Seq. | y             | y <sup>++</sup> | y*      | y <sup>*++</sup> | y <sup>0</sup> | y <sup>0++</sup> | #  |
|----|---------------|-----------------|---------|------------------|----------------|------------------|------|---------------|-----------------|---------|------------------|----------------|------------------|----|
| 1  | 114.09        | 57.55           |         |                  |                |                  | L    |               |                 |         |                  |                |                  | 11 |
| 2  | <b>171.11</b> | 86.06           |         |                  |                |                  | G    | 1044.54       | 522.78          | 1027.52 | 514.26           | 1026.53        | 513.77           | 10 |
| 3  | <b>286.14</b> | 143.57          |         |                  | 268.13         | 134.57           | D    | 987.52        | 494.26          | 970.50  | 485.75           | 969.51         | 485.26           | 9  |
| 4  | 383.19        | 192.10          |         |                  | 365.18         | 183.09           | P    | <b>872.49</b> | <b>436.75</b>   | 855.47  | 428.24           | 854.48         | <b>427.75</b>    | 8  |
| 5  | 484.24        | 242.62          |         |                  | 466.23         | 233.62           | T    | <b>775.44</b> | 388.22          | 758.42  | 379.71           | 757.43         | 379.22           | 7  |
| 6  | 585.29        | 293.15          |         |                  | 567.28         | 284.14           | T    | <b>674.39</b> | 337.70          | 657.37  | 329.19           | 656.38         | 328.70           | 6  |
| 7  | 713.38        | 357.20          | 696.36  | 348.68           | 695.37         | 348.19           | K    | <b>573.35</b> | 287.18          | 556.32  | 278.66           |                |                  | 5  |
| 8  | 869.48        | 435.25          | 852.46  | 426.73           | 851.47         | 426.24           | R    | <b>445.25</b> | 223.13          | 428.23  | 214.62           |                |                  | 4  |
| 9  | 997.54        | 499.27          | 980.52  | 490.76           | 979.53         | 490.27           | Q    | 289.15        | 145.08          | 272.12  | 136.57           |                |                  | 3  |
| 10 | 1068.58       | 534.79          | 1051.55 | 526.28           | 1050.57        | 525.79           | A    | 161.09        | 81.05           |         |                  |                |                  | 2  |
| 11 |               |                 |         |                  |                |                  | A    | 90.05         | 45.53           |         |                  |                |                  | 1  |

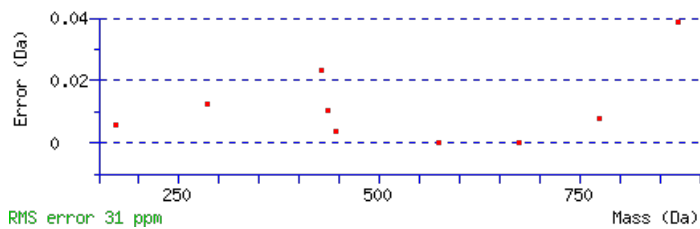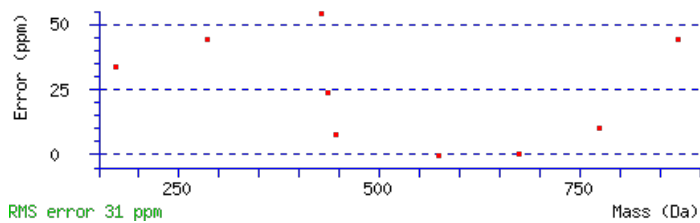

NCBI **BLAST** search of [LGDPTTKRQAA](#)

(Parameters: blastp, nr protein database, expect=20000, no filter, PAM30)

Other BLAST [web gateways](#)

### All matches to this query

| Score | Mr(calc): | Delta | Sequence                    |
|-------|-----------|-------|-----------------------------|
| 45.7  | 1156.62   | 0.03  | <a href="#">LGDPTTKRQAA</a> |
| 19.4  | 1156.60   | 0.05  | <a href="#">GEVPTSEKPTL</a> |
| 17.3  | 1156.68   | -0.03 | <a href="#">XMVRIFPPIG</a>  |
| 17.3  | 1156.64   | 0.00  | <a href="#">XMVRIFPPIG</a>  |
| 15.2  | 1156.65   | 0.00  | <a href="#">REAIKLVVDV</a>  |
| 12.8  | 1156.73   | -0.09 | <a href="#">AGKVKFIKLPG</a> |
| 11.9  | 1156.63   | 0.01  | <a href="#">VADLTSQLLPT</a> |
| 11.8  | 1156.69   | -0.05 | <a href="#">KKARSLGLGDL</a> |
| 11.6  | 1156.58   | 0.06  | <a href="#">ERTKSLATHD</a>  |
| 9.8   | 1156.66   | -0.01 | <a href="#">RETSISVLRP</a>  |

**Mascot:** <http://www.matrixscience.com/>



# Mascot Search Results

## Peptide View

### MS/MS Fragmentation of **IQTAVRLVLPGE**

Found in **Solyc02g038690.1.1**, evidence\_code:10F1H1E1IEG genomic\_reference:SL2.40ch02  
 gene\_region:22029221-22029625 transcript\_region:SL2.40ch02:22029221..22029625-  
 go\_terms:GO:0005515,GO:0003677 functional\_description:""Histone H2B (AHRD V1 \*\*\*-  
 A2IBL2\_NICBE); contains Interpro d

Match to Query 3916: 1294.796484 from(648.405518,2+)

Title: cyr\_090307\_meja\_05\_2\_bi3\_p.01769.01769.2\_41.813mins

Data file G:\Processed DATA\mgf\090307\_uniqua\_mgf\MGF\for Merge\merged meja0307 (2).mgf

Click mouse within plot area to zoom in by factor of two about that point

Or,   to  Da

Label all possible matches  Label matches used for scoring

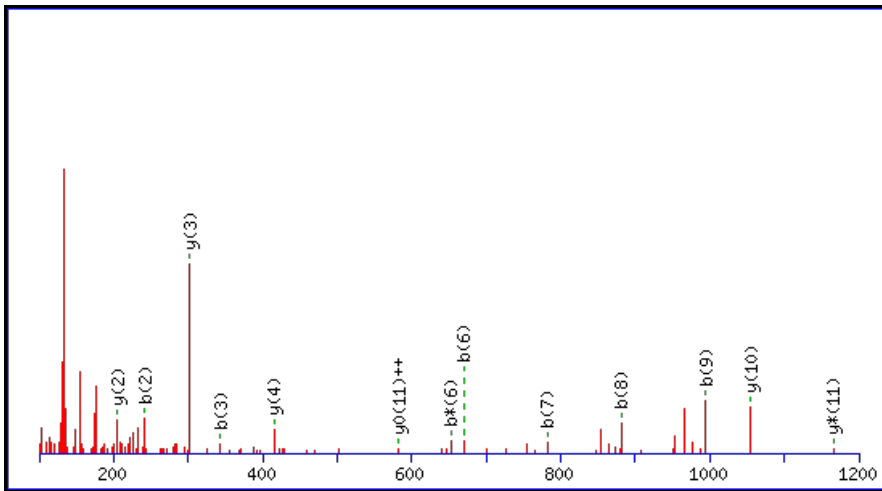

**Monoisotopic mass of neutral peptide Mr(calc):** 1294.76

**Ions Score:** 38 **Expect:** 0.024

**Matches :** 13/114 fragment ions using 20 most intense peaks ([help](#))

| #  | b             | b <sup>++</sup> | b*            | b <sup>+++</sup> | b <sup>0</sup> | b <sup>0++</sup> | Seq. | y              | y <sup>++</sup> | y*             | y <sup>+++</sup> | y <sup>0</sup> | y <sup>0++</sup> | #  |
|----|---------------|-----------------|---------------|------------------|----------------|------------------|------|----------------|-----------------|----------------|------------------|----------------|------------------|----|
| 1  | 114.09        | 57.55           |               |                  |                |                  | I    |                |                 |                |                  |                |                  | 12 |
| 2  | <b>242.15</b> | 121.58          | 225.12        | 113.07           |                |                  | Q    | 1182.68        | 591.85          | <b>1165.66</b> | 583.33           | 1164.67        | <b>582.84</b>    | 11 |
| 3  | <b>343.20</b> | 172.10          | 326.17        | 163.59           | 325.19         | 163.10           | T    | <b>1054.63</b> | 527.82          | 1037.60        | 519.30           | 1036.61        | 518.81           | 10 |
| 4  | 414.23        | 207.62          | 397.21        | 199.11           | 396.22         | 198.62           | A    | 953.58         | 477.29          | 936.55         | 468.78           | 935.57         | 468.29           | 9  |
| 5  | 513.30        | 257.16          | 496.28        | 248.64           | 495.29         | 248.15           | V    | 882.54         | 441.77          | 865.51         | 433.26           | 864.53         | 432.77           | 8  |
| 6  | <b>669.40</b> | 335.21          | <b>652.38</b> | 326.69           | 651.39         | 326.20           | R    | 783.47         | 392.24          | 766.45         | 383.73           | 765.46         | 383.23           | 7  |
| 7  | <b>782.49</b> | 391.75          | 765.46        | 383.23           | 764.48         | 382.74           | L    | 627.37         | 314.19          |                |                  | 609.36         | 305.18           | 6  |
| 8  | <b>881.56</b> | 441.28          | 864.53        | 432.77           | 863.55         | 432.28           | V    | 514.29         | 257.65          |                |                  | 496.28         | 248.64           | 5  |
| 9  | <b>994.64</b> | 497.82          | 977.61        | 489.31           | 976.63         | 488.82           | L    | <b>415.22</b>  | 208.11          |                |                  | 397.21         | 199.11           | 4  |
| 10 | 1091.69       | 546.35          | 1074.67       | 537.84           | 1073.68        | 537.35           | P    | <b>302.13</b>  | 151.57          |                |                  | 284.12         | 142.57           | 3  |
| 11 | 1148.72       | 574.86          | 1131.69       | 566.35           | 1130.70        | 565.86           | G    | <b>205.08</b>  | 103.04          |                |                  | 187.07         | 94.04            | 2  |
| 12 |               |                 |               |                  |                |                  | E    | 148.06         | 74.53           |                |                  | 130.05         | 65.53            | 1  |



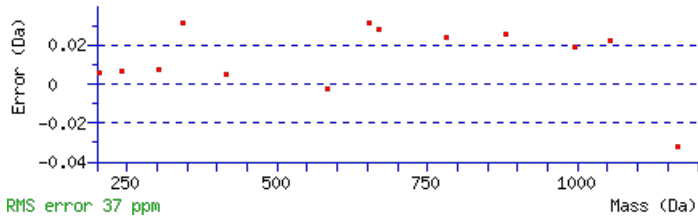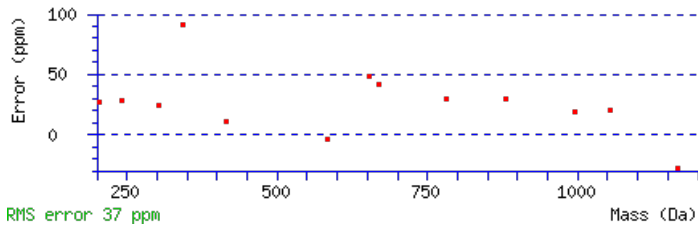

NCBI **BLAST** search of [IQTAVRLVLPGE](#)

(Parameters: blastp, nr protein database, expect=20000, no filter, PAM30)

Other BLAST [web gateways](#)

### All matches to this query

| Score | Mr(calc): | Delta | Sequence                       |
|-------|-----------|-------|--------------------------------|
| 38.2  | 1294.76   | 0.04  | <a href="#">IQTAVRLVLPGE</a>   |
| 9.0   | 1294.86   | -0.06 | <a href="#">LKTLALNLVLVV</a>   |
| 6.0   | 1294.70   | 0.10  | <a href="#">LQORLDAQLPN</a>    |
| 3.4   | 1294.75   | 0.05  | <a href="#">AGLTPSLLQVLPS</a>  |
| 3.2   | 1294.76   | 0.04  | <a href="#">KCIPRILGIPW</a>    |
| 3.1   | 1294.75   | 0.04  | <a href="#">LQTIILAFITY</a>    |
| 2.2   | 1294.70   | 0.10  | <a href="#">LQELANRQOPV</a>    |
| 1.8   | 1294.79   | 0.01  | <a href="#">KVL PSTTPGIGLI</a> |
| 1.8   | 1294.73   | 0.07  | <a href="#">PGFIKEAGLPPVA</a>  |
| 1.5   | 1294.71   | 0.08  | <a href="#">VEVSESHILAVL</a>   |

Mascot: <http://www.matrixscience.com/>

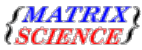

# Mascot Search Results

## Peptide View

MS/MS Fragmentation of **SHNDPLFHFGFGLTTPVK**

Found in **Solyc11g071640.1.1**, evidence\_code:10F0H1E1IEG genomic\_reference:SL2.40ch11

gene\_region:52141513-52144602 transcript\_region:SL2.40ch11:52141513..52144602+ go\_terms:GO:0008810

functional\_description: ""Beta-D-glucosidase (AHRD V1 \*\*\*- O82074\_TROMA); contains Interpro domai

Match to Query 12989: 2141.157126 from(714.726318,3+)

Title: cyr\_090307\_meja\_05\_2\_bi3\_p.01767.01767.3\_41.750mins

Data file G:\Processed DATA\mgf\090307\_uniqua\_mgf\MGF\for Merge\merged meja0307 (2).mgf

Click mouse within plot area to zoom in by factor of two about that point

Or,  to  Da

Label all possible matches  Label matches used for scoring

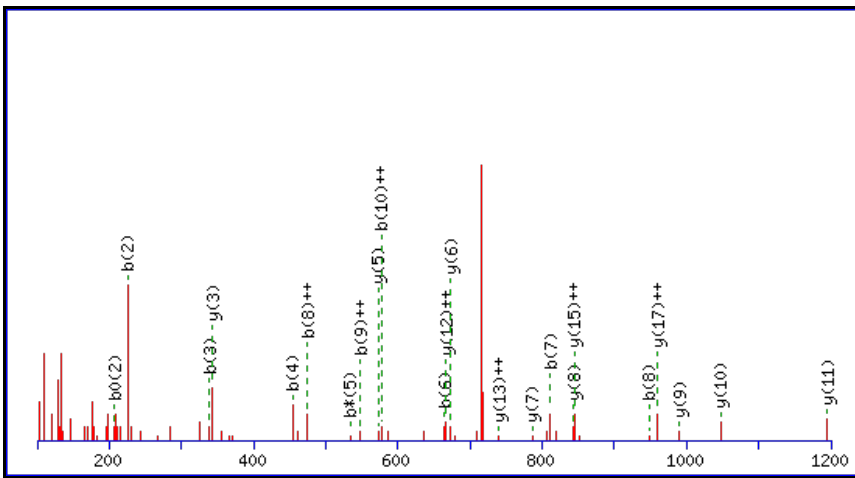

**Monoisotopic mass of neutral peptide Mr(calc):** 2141.11

**Ions Score:** 47 **Expect:** 0.0065

**Matches :** 23/204 fragment ions using 45 most intense peaks ([help](#))

| #  | b             | b <sup>++</sup> | b*            | b <sup>*++</sup> | b <sup>0</sup> | b <sup>0++</sup> | Seq. | y              | y <sup>++</sup> | y*      | y <sup>*++</sup> | y <sup>0</sup> | y <sup>0++</sup> | #  |
|----|---------------|-----------------|---------------|------------------|----------------|------------------|------|----------------|-----------------|---------|------------------|----------------|------------------|----|
| 1  | 88.04         | 44.52           |               |                  | 70.03          | 35.52            | S    |                |                 |         |                  |                |                  | 19 |
| 2  | <b>225.10</b> | 113.05          |               |                  | <b>207.09</b>  | 104.05           | H    | 2055.08        | 1028.04         | 2038.05 | 1019.53          | 2037.07        | 1019.04          | 18 |
| 3  | <b>339.14</b> | 170.07          | 322.11        | 161.56           | 321.13         | 161.07           | N    | 1918.02        | <b>959.51</b>   | 1901.00 | 951.00           | 1900.01        | 950.51           | 17 |
| 4  | <b>454.17</b> | 227.59          | 437.14        | 219.07           | 436.16         | 218.58           | D    | 1803.98        | 902.49          | 1786.95 | 893.98           | 1785.97        | 893.49           | 16 |
| 5  | 551.22        | 276.11          | <b>534.19</b> | 267.60           | 533.21         | 267.11           | P    | 1688.95        | <b>844.98</b>   | 1671.93 | 836.47           | 1670.94        | 835.97           | 15 |
| 6  | <b>664.30</b> | 332.66          | 647.28        | 324.14           | 646.29         | 323.65           | L    | 1591.90        | 796.45          | 1574.87 | 787.94           | 1573.89        | 787.45           | 14 |
| 7  | <b>811.37</b> | 406.19          | 794.35        | 397.68           | 793.36         | 397.19           | F    | 1478.82        | <b>739.91</b>   | 1461.79 | 731.40           | 1460.80        | 730.91           | 13 |
| 8  | <b>948.43</b> | <b>474.72</b>   | 931.41        | 466.21           | 930.42         | 465.71           | H    | 1331.75        | <b>666.38</b>   | 1314.72 | 657.86           | 1313.74        | 657.37           | 12 |
| 9  | 1095.50       | <b>548.25</b>   | 1078.47       | 539.74           | 1077.49        | 539.25           | F    | <b>1194.69</b> | 597.85          | 1177.66 | 589.33           | 1176.68        | 588.84           | 11 |
| 10 | 1152.52       | <b>576.76</b>   | 1135.50       | 568.25           | 1134.51        | 567.76           | G    | <b>1047.62</b> | 524.31          | 1030.59 | 515.80           | 1029.61        | 515.31           | 10 |
| 11 | 1299.59       | 650.30          | 1282.56       | 641.79           | 1281.58        | 641.29           | F    | <b>990.60</b>  | 495.80          | 973.57  | 487.29           | 972.59         | 486.80           | 9  |
| 12 | 1356.61       | 678.81          | 1339.59       | 670.30           | 1338.60        | 669.80           | G    | <b>843.53</b>  | 422.27          | 826.50  | 413.76           | 825.52         | 413.26           | 8  |
| 13 | 1469.70       | 735.35          | 1452.67       | 726.84           | 1451.69        | 726.35           | L    | <b>786.51</b>  | 393.76          | 769.48  | 385.24           | 768.50         | 384.75           | 7  |
| 14 | 1570.74       | 785.88          | 1553.72       | 777.36           | 1552.73        | 776.87           | T    | <b>673.42</b>  | 337.22          | 656.40  | 328.70           | 655.41         | 328.21           | 6  |
| 15 | 1671.79       | 836.40          | 1654.76       | 827.89           | 1653.78        | 827.39           | T    | <b>572.38</b>  | 286.69          | 555.35  | 278.18           | 554.37         | 277.69           | 5  |

|           |         |        |         |        |         |        |          |               |        |        |        |  |  |          |
|-----------|---------|--------|---------|--------|---------|--------|----------|---------------|--------|--------|--------|--|--|----------|
| <b>16</b> | 1799.89 | 900.45 | 1782.86 | 891.93 | 1781.88 | 891.44 | <b>K</b> | 471.33        | 236.17 | 454.30 | 227.65 |  |  | <b>4</b> |
| <b>17</b> | 1896.94 | 948.97 | 1879.91 | 940.46 | 1878.93 | 939.97 | <b>P</b> | <b>343.23</b> | 172.12 | 326.21 | 163.61 |  |  | <b>3</b> |
| <b>18</b> | 1996.01 | 998.51 | 1978.98 | 989.99 | 1978.00 | 989.50 | <b>V</b> | 246.18        | 123.59 | 229.15 | 115.08 |  |  | <b>2</b> |
| <b>19</b> |         |        |         |        |         |        | <b>K</b> | 147.11        | 74.06  | 130.09 | 65.55  |  |  | <b>1</b> |

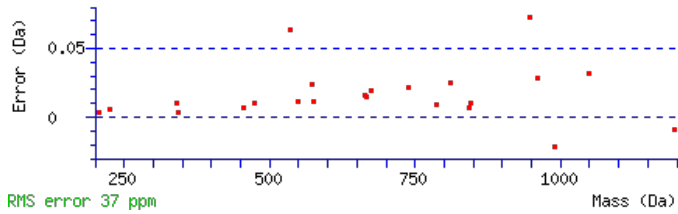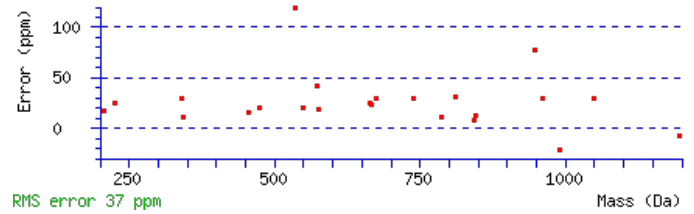

NCBI **BLAST** search of [SHNDPLFHFGFGLTTKPVK](#)

(Parameters: blastp, nr protein database, expect=20000, no filter, PAM30)

Other BLAST [web gateways](#)

### All matches to this query

| Score | Mr(calc): | Delta | Sequence                            |
|-------|-----------|-------|-------------------------------------|
| 46.6  | 2141.11   | 0.05  | <a href="#">SHNDPLFHFGFGLTTKPVK</a> |
| 0.8   | 2141.20   | -0.05 | <a href="#">KKPSYLEIMFIVMILIFG</a>  |
| 0.3   | 2141.09   | 0.06  | <a href="#">TYPYVWLTQLQPMVLMS</a>   |
| 0.3   | 2141.11   | 0.04  | <a href="#">QKYKEGKSMLEKFKICGP</a>  |
| 0.2   | 2141.23   | -0.07 | <a href="#">RSVPLYDKKGHKMKSURL</a>  |

**Mascot:** <http://www.matrixscience.com/>



# Mascot Search Results

## Peptide View

MS/MS Fragmentation of **DVLKLLLEKDAFL**

Found in **Solyc01g104170.2.1**, genomic\_reference:SL2.40ch01 gene\_region:84393496-84398307  
transcript\_region:SL2.40ch01:84393496..84398307- go\_terms:GO:0008381 functional\_description:""Ankyrin  
repeat domain-containing protein 2 (AHRD V1 \*\*\*- B6TNC0\_MAIZE); contains Interpro domain(

Match to Query 4438: 1402.818334 from(702.416443,2+)

Title: cyr\_090307\_un\_05\_2\_bi3\_p.02067.02067.2\_50.469mins

Data file G:\Processed DATA\mgf\090307\_uniqua\_mgf\MGF\un\_merge\merged 0307\_un.mgf

Click mouse within plot area to zoom in by factor of two about that point

Or,   to  Da

Label all possible matches  Label matches used for scoring

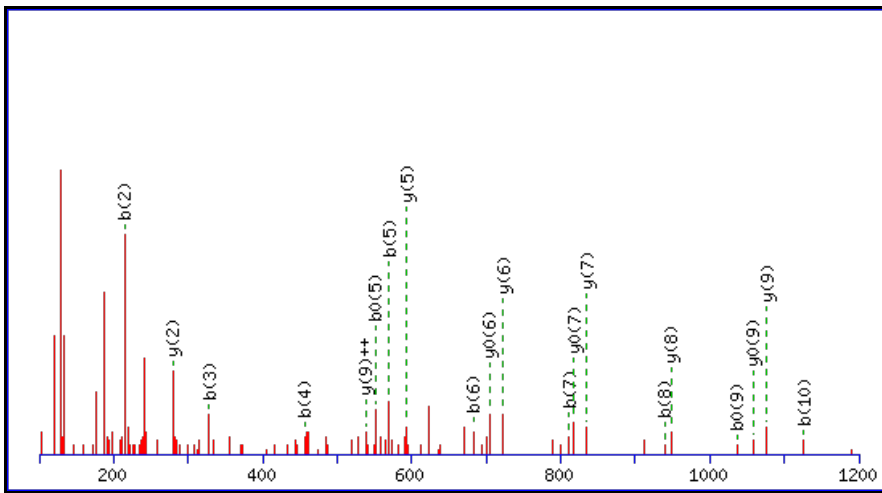

**Monoisotopic mass of neutral peptide Mr(calc):** 1402.81

**Ions Score:** 42 **Expect:** 0.018

**Matches :** 20/112 fragment ions using 39 most intense peaks ([help](#))

| #  | b              | b <sup>++</sup> | b*      | b <sup>+++</sup> | b <sup>0</sup> | b <sup>0++</sup> | Seq.     | y              | y <sup>++</sup> | y*      | y <sup>+++</sup> | y <sup>0</sup> | y <sup>0++</sup> | #  |
|----|----------------|-----------------|---------|------------------|----------------|------------------|----------|----------------|-----------------|---------|------------------|----------------|------------------|----|
| 1  | 116.03         | 58.52           |         |                  | 98.02          | 49.52            | <b>D</b> |                |                 |         |                  |                |                  | 12 |
| 2  | <b>215.10</b>  | 108.05          |         |                  | 197.09         | 99.05            | <b>V</b> | 1288.79        | 644.90          | 1271.76 | 636.38           | 1270.78        | 635.89           | 11 |
| 3  | <b>328.19</b>  | 164.60          |         |                  | 310.18         | 155.59           | <b>L</b> | 1189.72        | 595.36          | 1172.69 | 586.85           | 1171.71        | 586.36           | 10 |
| 4  | <b>456.28</b>  | 228.64          | 439.26  | 220.13           | 438.27         | 219.64           | <b>K</b> | <b>1076.64</b> | <b>538.82</b>   | 1059.61 | 530.31           | <b>1058.62</b> | 529.82           | 9  |
| 5  | <b>569.37</b>  | 285.19          | 552.34  | 276.67           | <b>551.36</b>  | 276.18           | <b>L</b> | <b>948.54</b>  | 474.77          | 931.51  | 466.26           | 930.53         | 465.77           | 8  |
| 6  | <b>682.45</b>  | 341.73          | 665.42  | 333.22           | 664.44         | 332.72           | <b>L</b> | <b>835.46</b>  | 418.23          | 818.43  | 409.72           | <b>817.45</b>  | 409.23           | 7  |
| 7  | <b>811.49</b>  | 406.25          | 794.47  | 397.74           | 793.48         | 397.24           | <b>E</b> | <b>722.37</b>  | 361.69          | 705.35  | 353.18           | <b>704.36</b>  | 352.68           | 6  |
| 8  | <b>939.59</b>  | 470.30          | 922.56  | 461.78           | 921.58         | 461.29           | <b>K</b> | <b>593.33</b>  | 297.17          | 576.30  | 288.66           | 575.32         | 288.16           | 5  |
| 9  | 1054.61        | 527.81          | 1037.59 | 519.30           | <b>1036.60</b> | 518.81           | <b>D</b> | 465.23         | 233.12          |         |                  | 447.22         | 224.12           | 4  |
| 10 | <b>1125.65</b> | 563.33          | 1108.62 | 554.82           | 1107.64        | 554.32           | <b>A</b> | 350.21         | 175.61          |         |                  |                |                  | 3  |
| 11 | 1272.72        | 636.86          | 1255.69 | 628.35           | 1254.71        | 627.86           | <b>F</b> | <b>279.17</b>  | 140.09          |         |                  |                |                  | 2  |
| 12 |                |                 |         |                  |                |                  | <b>L</b> | 132.10         | 66.55           |         |                  |                |                  | 1  |

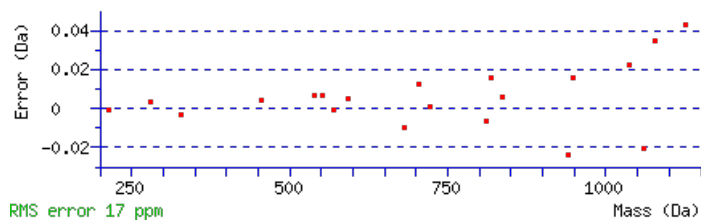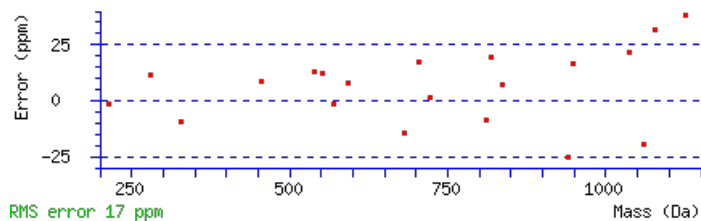

NCBI **BLAST** search of [DVLKLEKDAFL](#)

(Parameters: blastp, nr protein database, expect=20000, no filter, PAM30)

Other BLAST [web gateways](#)

### All matches to this query

| Score | Mr(calc): | Delta | Sequence                       |
|-------|-----------|-------|--------------------------------|
| 42.2  | 1402.81   | 0.01  | <a href="#">DVLKLEKDAFL</a>    |
| 10.2  | 1402.80   | 0.02  | <a href="#">KYLPLFWQLVP</a>    |
| 9.8   | 1402.78   | 0.04  | <a href="#">CSHKIIHLDIKP</a>   |
| 9.6   | 1402.86   | -0.04 | <a href="#">LKG YFLLNIPL</a>   |
| 8.6   | 1402.77   | 0.05  | <a href="#">KIVLDDELOALF</a>   |
| 7.9   | 1402.76   | 0.06  | <a href="#">KQALQQLSQMKT</a>   |
| 7.8   | 1402.86   | -0.04 | <a href="#">LTLKPPVITKF</a>    |
| 7.7   | 1402.83   | -0.01 | <a href="#">LTLEKDLRRIF</a>    |
| 7.1   | 1402.83   | -0.01 | <a href="#">KLLVMCEKRRK</a>    |
| 5.9   | 1402.81   | 0.01  | <a href="#">SVGIVMALSTVLIT</a> |

Mascot: <http://www.matrixscience.com/>



# Mascot Search Results

## Peptide View

### MS/MS Fragmentation of **LTVIGGASERVPT**

Found in **Solyc06g063370.2.1**, genomic\_reference:SL2.40ch06 gene\_region:36437291-36439451

transcript\_region:SL2.40ch06:36437291..36439451- go\_terms:GO:0016020

functional\_description:""Chlorophyll a-b binding protein 1A, chloroplastic (AHRD V1 \*\*\*- CB2A\_PYRPY); contains Interpro do

Match to Query 3961: 1298.752294 from(650.383423,2+)

Title: cyr\_090307\_meja\_05\_2\_bi5\_p.01493.01493.2\_34.706mins

Data file G:\Processed DATA\mgf\090307\_uniqua\_mgf\MGF\for Merge\merged meja0307 (2).mgf

Click mouse within plot area to zoom in by factor of two about that point

Or,   to  Da

Label all possible matches  Label matches used for scoring

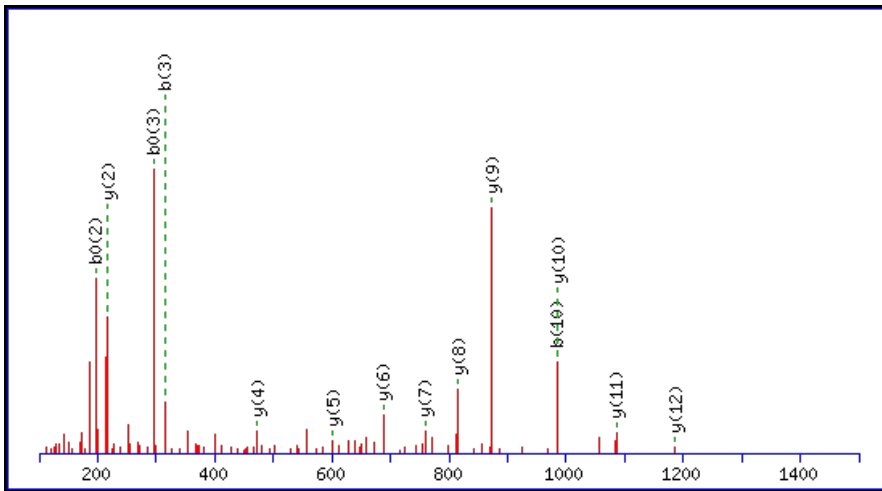

**Monoisotopic mass of neutral peptide Mr(calc):** 1298.72

**Ions Score:** 87 **Expect:** 7.7e-007

**Matches :** 14/118 fragment ions using 21 most intense peaks ([help](#))

| #  | b       | b <sup>++</sup> | b*      | b <sup>+++</sup> | b <sup>0</sup> | b <sup>0++</sup> | Seq. | y       | y <sup>++</sup> | y*      | y <sup>+++</sup> | y <sup>0</sup> | y <sup>0++</sup> | #  |
|----|---------|-----------------|---------|------------------|----------------|------------------|------|---------|-----------------|---------|------------------|----------------|------------------|----|
| 1  | 114.09  | 57.55           |         |                  |                |                  | L    |         |                 |         |                  |                |                  | 13 |
| 2  | 215.14  | 108.07          |         |                  | 197.13         | 99.07            | T    | 1186.64 | 593.82          | 1169.62 | 585.31           | 1168.63        | 584.82           | 12 |
| 3  | 314.21  | 157.61          |         |                  | 296.20         | 148.60           | V    | 1085.59 | 543.30          | 1068.57 | 534.79           | 1067.58        | 534.30           | 11 |
| 4  | 427.29  | 214.15          |         |                  | 409.28         | 205.14           | I    | 986.53  | 493.77          | 969.50  | 485.25           | 968.52         | 484.76           | 10 |
| 5  | 484.31  | 242.66          |         |                  | 466.30         | 233.65           | G    | 873.44  | 437.22          | 856.42  | 428.71           | 855.43         | 428.22           | 9  |
| 6  | 541.33  | 271.17          |         |                  | 523.32         | 262.17           | G    | 816.42  | 408.71          | 799.39  | 400.20           | 798.41         | 399.71           | 8  |
| 7  | 612.37  | 306.69          |         |                  | 594.36         | 297.68           | A    | 759.40  | 380.20          | 742.37  | 371.69           | 741.39         | 371.20           | 7  |
| 8  | 699.40  | 350.21          |         |                  | 681.39         | 341.20           | S    | 688.36  | 344.68          | 671.34  | 336.17           | 670.35         | 335.68           | 6  |
| 9  | 828.45  | 414.73          |         |                  | 810.44         | 405.72           | E    | 601.33  | 301.17          | 584.30  | 292.66           | 583.32         | 292.16           | 5  |
| 10 | 984.55  | 492.78          | 967.52  | 484.26           | 966.54         | 483.77           | R    | 472.29  | 236.65          | 455.26  | 228.13           | 454.28         | 227.64           | 4  |
| 11 | 1083.62 | 542.31          | 1066.59 | 533.80           | 1065.61        | 533.31           | V    | 316.19  | 158.60          |         |                  | 298.18         | 149.59           | 3  |
| 12 | 1180.67 | 590.84          | 1163.64 | 582.32           | 1162.66        | 581.83           | P    | 217.12  | 109.06          |         |                  | 199.11         | 100.06           | 2  |

|    |  |  |  |  |  |   |        |       |  |  |        |       |   |
|----|--|--|--|--|--|---|--------|-------|--|--|--------|-------|---|
| 13 |  |  |  |  |  | T | 120.07 | 60.54 |  |  | 102.05 | 51.53 | 1 |
|----|--|--|--|--|--|---|--------|-------|--|--|--------|-------|---|

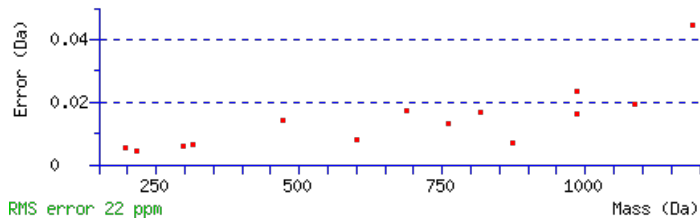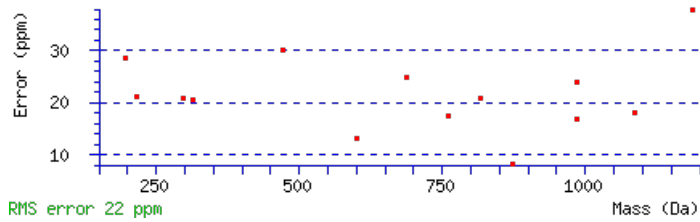

NCBI **BLAST** search of [LTVIGGASERVPT](#)

(Parameters: blastp, nr protein database, expect=20000, no filter, PAM30)

Other BLAST [web gateways](#)

### All matches to this query

| Score | Mr(calc): | Delta | Sequence                      |
|-------|-----------|-------|-------------------------------|
| 86.5  | 1298.72   | 0.03  | <a href="#">LTVIGGASERVPT</a> |
| 23.6  | 1298.75   | 0.00  | <a href="#">LTVLRGRGMPSL</a>  |
| 23.0  | 1298.77   | -0.01 | <a href="#">TVLINALRKTGN</a>  |
| 20.5  | 1298.68   | 0.07  | <a href="#">LISLQGQEIANN</a>  |
| 16.6  | 1298.73   | 0.03  | <a href="#">LSICPTKGATVP</a>  |
| 13.4  | 1298.66   | 0.09  | <a href="#">TLVLPESPDTVE</a>  |
| 13.4  | 1298.69   | 0.07  | <a href="#">TLVLYSRIGYD</a>   |
| 12.5  | 1298.80   | -0.04 | <a href="#">ISILPSEPGIKK</a>  |
| 12.1  | 1298.65   | 0.10  | <a href="#">CIPTKGATVPPDT</a> |
| 12.1  | 1298.69   | 0.06  | <a href="#">ISLLPPSMVSQAG</a> |

Mascot: <http://www.matrixscience.com/>



# Mascot Search Results

## Peptide View

### MS/MS Fragmentation of **EGRSTPVKFS AHLKED**

Found in **Solyc01g087520.2.1**, genomic\_reference:SL2.40ch01 gene\_region:74221192-74222066

transcript\_region:SL2.40ch01:74221192..74222066+ go\_terms:GO:0009536

functional\_description: ""Ferredoxin-thioredoxin reductase variable chain (AHRD V1 \*-\*- B6UCW8\_MAIZE); contains Interpro do

Match to Query 9316: 1799.897421 from(600.973083,3+)

Title: cyr\_090307\_maja\_05\_2\_bi4\_p.01178.01178.3\_26.584mins

Data file G:\Processed DATA\mgf\090307\_uniqua\_mgf\MGF\for Merge\merged\_maja0307 (2).mgf

Click mouse within plot area to zoom in by factor of two about that point

Or,   to  Da

Label all possible matches  Label matches used for scoring

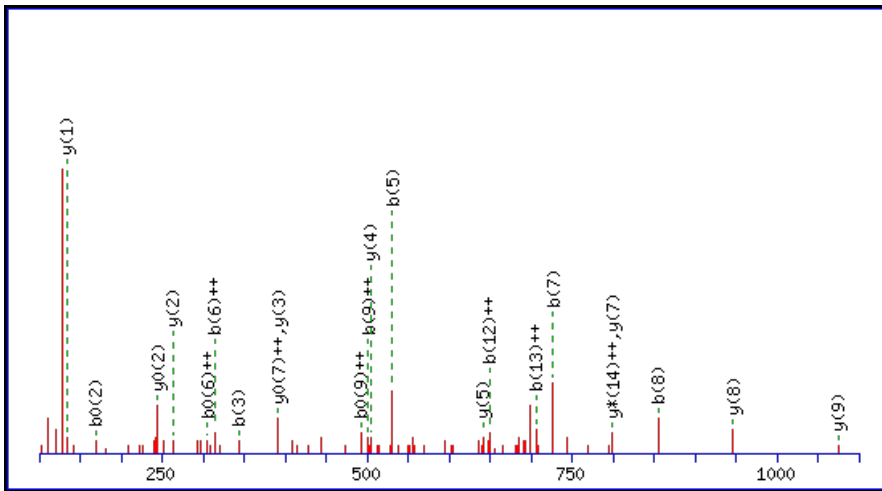

**Monoisotopic mass of neutral peptide Mr(calc):** 1799.92

**Ions Score:** 40 **Expect:** 0.043

**Matches:** 22/172 fragment ions using 38 most intense peaks ([help](#))

| #  | b       | b <sup>++</sup> | b <sup>*</sup> | b <sup>*++</sup> | b <sup>0</sup> | b <sup>0++</sup> | Seq.     | y       | y <sup>++</sup> | y <sup>*</sup> | y <sup>*++</sup> | y <sup>0</sup> | y <sup>0++</sup> | #  |
|----|---------|-----------------|----------------|------------------|----------------|------------------|----------|---------|-----------------|----------------|------------------|----------------|------------------|----|
| 1  | 130.05  | 65.53           |                |                  | 112.04         | 56.52            | <b>E</b> |         |                 |                |                  |                |                  | 16 |
| 2  | 187.07  | 94.04           |                |                  | 169.06         | 85.03            | <b>G</b> | 1671.88 | 836.44          | 1654.85        | 827.93           | 1653.87        | 827.44           | 15 |
| 3  | 343.17  | 172.09          | 326.15         | 163.58           | 325.16         | 163.08           | <b>R</b> | 1614.86 | 807.93          | 1597.83        | 799.42           | 1596.85        | 798.93           | 14 |
| 4  | 430.20  | 215.61          | 413.18         | 207.09           | 412.19         | 206.60           | <b>S</b> | 1458.76 | 729.88          | 1441.73        | 721.37           | 1440.75        | 720.88           | 13 |
| 5  | 531.25  | 266.13          | 514.23         | 257.62           | 513.24         | 257.12           | <b>T</b> | 1371.73 | 686.37          | 1354.70        | 677.85           | 1353.72        | 677.36           | 12 |
| 6  | 628.30  | 314.66          | 611.28         | 306.14           | 610.29         | 305.65           | <b>P</b> | 1270.68 | 635.84          | 1253.65        | 627.33           | 1252.67        | 626.84           | 11 |
| 7  | 727.37  | 364.19          | 710.35         | 355.68           | 709.36         | 355.19           | <b>V</b> | 1173.63 | 587.32          | 1156.60        | 578.80           | 1155.62        | 578.31           | 10 |
| 8  | 855.47  | 428.24          | 838.44         | 419.72           | 837.46         | 419.23           | <b>K</b> | 1074.56 | 537.78          | 1057.53        | 529.27           | 1056.55        | 528.78           | 9  |
| 9  | 1002.54 | 501.77          | 985.51         | 493.26           | 984.53         | 492.77           | <b>F</b> | 946.46  | 473.74          | 929.44         | 465.22           | 928.45         | 464.73           | 8  |
| 10 | 1089.57 | 545.29          | 1072.54        | 536.77           | 1071.56        | 536.28           | <b>S</b> | 799.39  | 400.20          | 782.37         | 391.69           | 781.38         | 391.20           | 7  |
| 11 | 1160.61 | 580.81          | 1143.58        | 572.29           | 1142.60        | 571.80           | <b>A</b> | 712.36  | 356.68          | 695.34         | 348.17           | 694.35         | 347.68           | 6  |
| 12 | 1297.66 | 649.34          | 1280.64        | 640.82           | 1279.65        | 640.33           | <b>H</b> | 641.33  | 321.17          | 624.30         | 312.65           | 623.31         | 312.16           | 5  |



|    |         |        |         |        |         |        |   |        |        |        |        |        |        |   |
|----|---------|--------|---------|--------|---------|--------|---|--------|--------|--------|--------|--------|--------|---|
| 13 | 1410.75 | 705.88 | 1393.72 | 697.36 | 1392.74 | 696.87 | L | 504.27 | 252.64 | 487.24 | 244.12 | 486.26 | 243.63 | 4 |
| 14 | 1538.84 | 769.93 | 1521.82 | 761.41 | 1520.83 | 760.92 | K | 391.18 | 196.09 | 374.16 | 187.58 | 373.17 | 187.09 | 3 |
| 15 | 1667.89 | 834.45 | 1650.86 | 825.93 | 1649.88 | 825.44 | E | 263.09 | 132.05 |        |        | 245.08 | 123.04 | 2 |
| 16 |         |        |         |        |         |        | D | 134.04 | 67.53  |        |        | 116.03 | 58.52  | 1 |

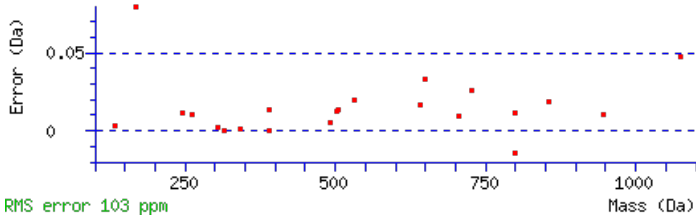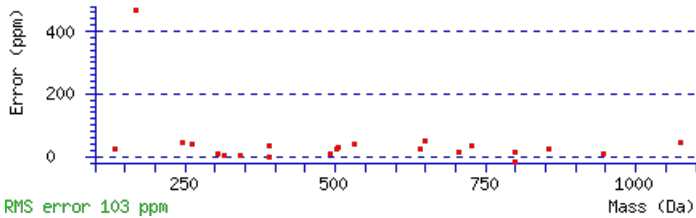

NCBI **BLAST** search of [EGRSTPVKFS AHLKED](#)

(Parameters: blastp, nr protein database, expect=20000, no filter, PAM30)

Other BLAST [web gateways](#)

#### All matches to this query

| Score | Mr(calc): | Delta | Sequence                           |
|-------|-----------|-------|------------------------------------|
| 39.7  | 1799.92   | -0.02 | <a href="#">EGRSTPVKFS AHLKED</a>  |
| 12.5  | 1799.91   | -0.02 | <a href="#">KVLEQEK MVEYYKN</a>    |
| 12.2  | 1799.90   | 0.00  | <a href="#">QFKICTPKK VMSFED</a>   |
| 11.3  | 1799.82   | 0.08  | <a href="#">QLDADLAAGMGMPDNGPK</a> |
| 9.7   | 1799.92   | -0.03 | <a href="#">IVEFHTKAVMNGNLDL</a>   |
| 8.8   | 1799.97   | -0.07 | <a href="#">QLLVSSNER WSLHT</a>    |
| 8.5   | 1799.86   | 0.04  | <a href="#">FDQLENQKARTNHA E</a>   |
| 7.4   | 1799.96   | -0.07 | <a href="#">KVARTIADLE ESENIL</a>  |
| 6.7   | 1799.94   | -0.04 | <a href="#">KKLE EYVPSHEGVASK</a>  |
| 6.0   | 1799.86   | 0.04  | <a href="#">CDLNAPIQDVVEVSTPT</a>  |

Mascot: <http://www.matrixscience.com/>



# Mascot Search Results

## Peptide View

### MS/MS Fragmentation of **EGRSTPVKFS AHLKEDE**

Found in **Solyc01g087520.2.1**, genomic\_reference:SL2.40ch01 gene\_region:74221192-74222066

transcript\_region:SL2.40ch01:74221192..74222066+ go\_terms:GO:0009536

functional\_description: ""Ferredoxin-thioredoxin reductase variable chain (AHRD V1 \*-\*- B6UCW8\_MAIZE); contains Interpro do

Match to Query 10727: 1929.009849 from(644.010559,3+)

Title: cyr\_090307\_maja\_05\_2\_bi4\_p.01182.01182.3\_26.690mins

Data file G:\Processed DATA\mgf\090307\_uniqua\_mgf\MGF\for Merge\merged\_maja0307 (2).mgf

Click mouse within plot area to zoom in by factor of two about that point

Or,   to  Da

Label all possible matches  Label matches used for scoring

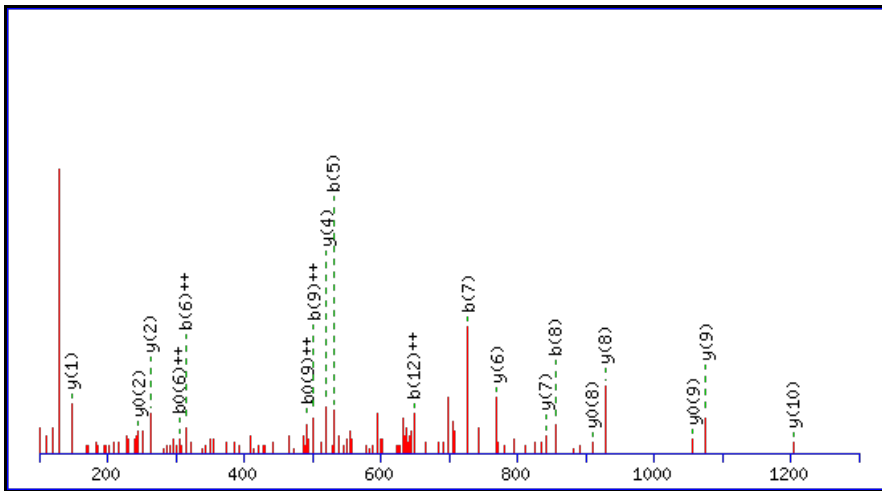

**Monoisotopic mass of neutral peptide Mr(calc):** 1928.96

**Ions Score:** 68 **Expect:** 6.3e-005

**Matches:** 19/182 fragment ions using 21 most intense peaks ([help](#))

| #  | b             | b <sup>++</sup> | b <sup>*</sup> | b <sup>*++</sup> | b <sup>0</sup> | b <sup>0++</sup> | Seq.     | y              | y <sup>++</sup> | y <sup>*</sup> | y <sup>*++</sup> | y <sup>0</sup> | y <sup>0++</sup> | #  |
|----|---------------|-----------------|----------------|------------------|----------------|------------------|----------|----------------|-----------------|----------------|------------------|----------------|------------------|----|
| 1  | 130.05        | 65.53           |                |                  | 112.04         | 56.52            | <b>E</b> |                |                 |                |                  |                |                  | 17 |
| 2  | 187.07        | 94.04           |                |                  | 169.06         | 85.03            | <b>G</b> | 1800.92        | 900.97          | 1783.90        | 892.45           | 1782.91        | 891.96           | 16 |
| 3  | 343.17        | 172.09          | 326.15         | 163.58           | 325.16         | 163.08           | <b>R</b> | 1743.90        | 872.45          | 1726.88        | 863.94           | 1725.89        | 863.45           | 15 |
| 4  | 430.20        | 215.61          | 413.18         | 207.09           | 412.19         | 206.60           | <b>S</b> | 1587.80        | 794.40          | 1570.77        | 785.89           | 1569.79        | 785.40           | 14 |
| 5  | <b>531.25</b> | 266.13          | 514.23         | 257.62           | 513.24         | 257.12           | <b>T</b> | 1500.77        | 750.89          | 1483.74        | 742.38           | 1482.76        | 741.88           | 13 |
| 6  | 628.30        | <b>314.66</b>   | 611.28         | 306.14           | 610.29         | <b>305.65</b>    | <b>P</b> | 1399.72        | 700.36          | 1382.70        | 691.85           | 1381.71        | 691.36           | 12 |
| 7  | <b>727.37</b> | 364.19          | 710.35         | 355.68           | 709.36         | 355.19           | <b>V</b> | 1302.67        | 651.84          | 1285.64        | 643.32           | 1284.66        | 642.83           | 11 |
| 8  | <b>855.47</b> | 428.24          | 838.44         | 419.72           | 837.46         | 419.23           | <b>K</b> | <b>1203.60</b> | 602.30          | 1186.57        | 593.79           | 1185.59        | 593.30           | 10 |
| 9  | 1002.54       | <b>501.77</b>   | 985.51         | 493.26           | 984.53         | <b>492.77</b>    | <b>F</b> | <b>1075.51</b> | 538.26          | 1058.48        | 529.74           | <b>1057.49</b> | 529.25           | 9  |
| 10 | 1089.57       | 545.29          | 1072.54        | 536.77           | 1071.56        | 536.28           | <b>S</b> | <b>928.44</b>  | 464.72          | 911.41         | 456.21           | <b>910.43</b>  | 455.72           | 8  |
| 11 | 1160.61       | 580.81          | 1143.58        | 572.29           | 1142.60        | 571.80           | <b>A</b> | <b>841.41</b>  | 421.21          | 824.38         | 412.69           | 823.39         | 412.20           | 7  |
| 12 | 1297.66       | <b>649.34</b>   | 1280.64        | 640.82           | 1279.65        | 640.33           | <b>H</b> | <b>770.37</b>  | 385.69          | 753.34         | 377.17           | 752.36         | 376.68           | 6  |

|    |         |        |         |        |         |        |   |        |        |        |        |        |        |   |
|----|---------|--------|---------|--------|---------|--------|---|--------|--------|--------|--------|--------|--------|---|
| 13 | 1410.75 | 705.88 | 1393.72 | 697.36 | 1392.74 | 696.87 | L | 633.31 | 317.16 | 616.28 | 308.64 | 615.30 | 308.15 | 5 |
| 14 | 1538.84 | 769.93 | 1521.82 | 761.41 | 1520.83 | 760.92 | K | 520.22 | 260.62 | 503.20 | 252.10 | 502.21 | 251.61 | 4 |
| 15 | 1667.89 | 834.45 | 1650.86 | 825.93 | 1649.88 | 825.44 | E | 392.13 | 196.57 |        |        | 374.12 | 187.56 | 3 |
| 16 | 1782.91 | 891.96 | 1765.89 | 883.45 | 1764.90 | 882.96 | D | 263.09 | 132.05 |        |        | 245.08 | 123.04 | 2 |
| 17 |         |        |         |        |         |        | E | 148.06 | 74.53  |        |        | 130.05 | 65.53  | 1 |

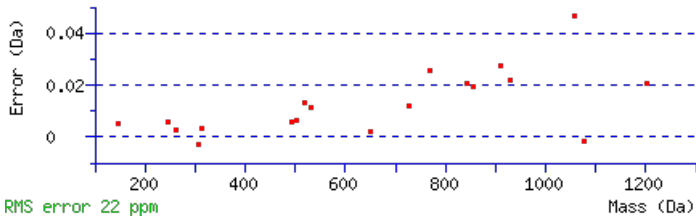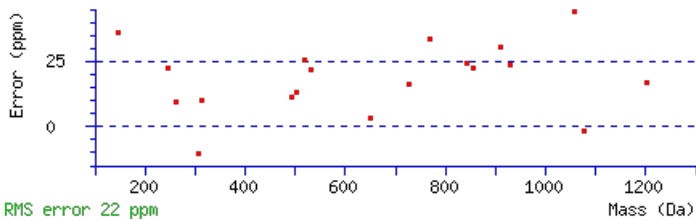

NCBI BLAST search of [EGRSTPVKFS AHLKEDE](#)

(Parameters: blastp, nr protein database, expect=20000, no filter, PAM30)

Other BLAST [web gateways](#)

#### All matches to this query

| Score | Mr(calc): | Delta | Sequence                            |
|-------|-----------|-------|-------------------------------------|
| 67.7  | 1928.96   | 0.05  | <a href="#">EGRSTPVKFS AHLKEDE</a>  |
| 8.0   | 1928.97   | 0.04  | <a href="#">KLNEIEQAAVIHYDGVM</a>   |
| 6.7   | 1929.10   | -0.09 | <a href="#">KYDLLESILVRQRLSP</a>    |
| 6.3   | 1928.97   | 0.04  | <a href="#">EGKTLVVGAEPPAPKKACC</a> |
| 5.2   | 1929.01   | 0.00  | <a href="#">QKIEEVEKEYPGAPLSI</a>   |
| 4.6   | 1929.02   | -0.01 | <a href="#">LQDLSGKLFKTISDLDH</a>   |
| 4.2   | 1928.93   | 0.08  | <a href="#">QQVANSKVPVVENGETQC</a>  |
| 3.4   | 1929.09   | -0.08 | <a href="#">QRLISEKIWSVHHIIA</a>    |
| 2.9   | 1928.98   | 0.03  | <a href="#">KHVYNGVGHAFHILHNS</a>   |
| 2.7   | 1929.01   | 0.00  | <a href="#">GMVLIRGNSMVTIEALEP</a>  |

Mascot: <http://www.matrixscience.com/>

# MASCOT SCIENCE Mascot Search Results

## Peptide View

MS/MS Fragmentation of **FNKVN~~YANVSTNNY~~ALDEVEEVK**

Found in **Solyc09g063130.2.1**, genomic\_reference:SL2.40ch09 gene\_region:56787134-56789056

transcript\_region:SL2.40ch09:56787134..56789056+ go\_terms:GO:0009536,GO:0009538

functional\_description:""Photosystem I reaction center subunit IV A (AHRD V1 \*-\*- B6TH55\_MAIZE); contains Inter

Match to Query 17240: 2659.363548 from(887.461792,3+)

Title: cyr\_090307\_meja\_05\_2\_bi3\_p.01650.01650.3\_38.703mins

Data file G:\Processed DATA\mgf090307\_uniqua\_mgf\MGF\for Merge\merged meja0307 (2).mgf

Click mouse within plot area to zoom in by factor of two about that point

Or,   to  Da

Label all possible matches  Label matches used for scoring

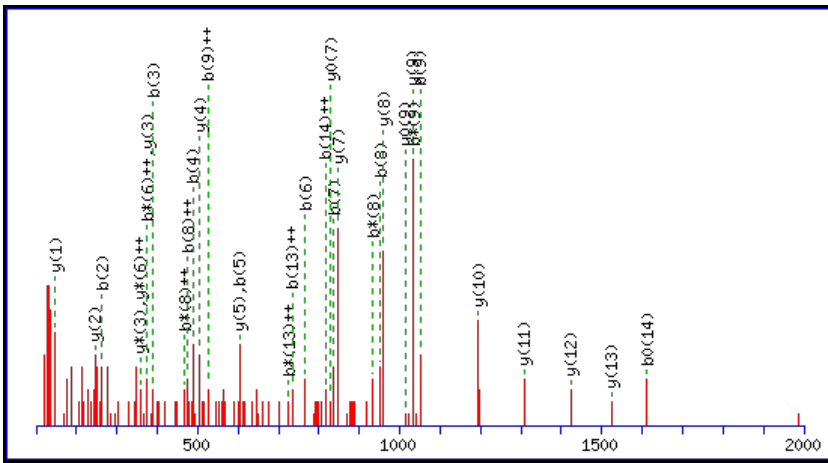

Monoisotopic mass of neutral peptide  $M_r(\text{calc})$ : 2659.28

Ions Score: 91 Expect: 2.2e-007

Matches : 34/240 fragment ions using 51 most intense peaks ([help](#))

| #  | b              | b <sup>++</sup> | b*             | b <sup>*++</sup> | b <sup>0</sup> | b <sup>0++</sup> | Seq. | y              | y <sup>++</sup> | y*      | y <sup>*++</sup> | y <sup>0</sup> | y <sup>0++</sup> | #  |
|----|----------------|-----------------|----------------|------------------|----------------|------------------|------|----------------|-----------------|---------|------------------|----------------|------------------|----|
| 1  | 148.08         | 74.54           |                |                  |                |                  | F    |                |                 |         |                  |                |                  | 23 |
| 2  | <b>262.12</b>  | 131.56          | 245.09         | 123.05           |                |                  | N    | 2513.22        | 1257.11         | 2496.19 | 1248.60          | 2495.20        | 1248.11          | 22 |
| 3  | <b>390.21</b>  | 195.61          | 373.19         | 187.10           |                |                  | K    | 2399.17        | 1200.09         | 2382.15 | 1191.58          | 2381.16        | 1191.08          | 21 |
| 4  | <b>489.28</b>  | 245.14          | 472.26         | 236.63           |                |                  | V    | 2271.08        | 1136.04         | 2254.05 | 1127.53          | 2253.07        | 1127.04          | 20 |
| 5  | <b>603.32</b>  | 302.17          | 586.30         | 293.65           |                |                  | N    | 2172.01        | 1086.51         | 2154.98 | 1077.99          | 2154.00        | 1077.50          | 19 |
| 6  | <b>766.39</b>  | 383.70          | 749.36         | <b>375.18</b>    |                |                  | Y    | 2057.97        | 1029.49         | 2040.94 | 1020.97          | 2039.96        | 1020.48          | 18 |
| 7  | <b>837.43</b>  | 419.22          | 820.40         | 410.70           |                |                  | A    | 1894.90        | 947.96          | 1877.88 | 939.44           | 1876.89        | 938.95           | 17 |
| 8  | <b>951.47</b>  | <b>476.24</b>   | <b>934.44</b>  | <b>467.72</b>    |                |                  | N    | 1823.87        | 912.44          | 1806.84 | 903.92           | 1805.86        | 903.43           | 16 |
| 9  | <b>1050.54</b> | <b>525.77</b>   | <b>1033.51</b> | 517.26           |                |                  | V    | 1709.82        | 855.42          | 1692.80 | 846.90           | 1691.81        | 846.41           | 15 |
| 10 | 1137.57        | 569.29          | 1120.54        | 560.77           | 1119.56        | 560.28           | S    | 1610.75        | 805.88          | 1593.73 | 797.37           | 1592.74        | 796.88           | 14 |
| 11 | 1238.62        | 619.81          | 1221.59        | 611.30           | 1220.61        | 610.81           | T    | <b>1523.72</b> | 762.36          | 1506.70 | 753.85           | 1505.71        | 753.36           | 13 |
| 12 | 1352.66        | 676.83          | 1335.63        | 668.32           | 1334.65        | 667.83           | N    | <b>1422.67</b> | 711.84          | 1405.65 | 703.33           | 1404.66        | 702.84           | 12 |
| 13 | 1466.70        | <b>733.85</b>   | 1449.68        | <b>725.34</b>    | 1448.69        | 724.85           | N    | <b>1308.63</b> | 654.82          | 1291.61 | 646.31           | 1290.62        | 645.81           | 11 |
| 14 | 1629.77        | <b>815.39</b>   | 1612.74        | 806.87           | <b>1611.76</b> | 806.38           | Y    | <b>1194.59</b> | 597.80          | 1177.56 | 589.28           | 1176.58        | 588.79           | 10 |
| 15 | 1700.80        | 850.90          | 1683.78        | 842.39           | 1682.79        | 841.90           | A    | <b>1031.53</b> | 516.27          | 1014.50 | 507.75           | <b>1013.51</b> | 507.26           | 9  |
| 16 | 1813.89        | 907.45          | 1796.86        | 898.93           | 1795.88        | 898.44           | L    | <b>960.49</b>  | 480.75          | 943.46  | 472.23           | 942.48         | 471.74           | 8  |

|    |         |         |         |         |         |         |   |        |        |        |        |        |        |   |
|----|---------|---------|---------|---------|---------|---------|---|--------|--------|--------|--------|--------|--------|---|
| 17 | 1928.91 | 964.96  | 1911.89 | 956.45  | 1910.90 | 955.96  | D | 847.40 | 424.21 | 830.38 | 415.69 | 829.39 | 415.20 | 7 |
| 18 | 2057.96 | 1029.48 | 2040.93 | 1020.97 | 2039.95 | 1020.48 | E | 732.38 | 366.69 | 715.35 | 358.18 | 714.37 | 357.69 | 6 |
| 19 | 2157.02 | 1079.02 | 2140.00 | 1070.50 | 2139.01 | 1070.01 | V | 603.33 | 302.17 | 586.31 | 293.66 | 585.32 | 293.17 | 5 |
| 20 | 2286.07 | 1143.54 | 2269.04 | 1135.02 | 2268.06 | 1134.53 | E | 504.27 | 252.64 | 487.24 | 244.12 | 486.26 | 243.63 | 4 |
| 21 | 2415.11 | 1208.06 | 2398.08 | 1199.55 | 2397.10 | 1199.05 | E | 375.22 | 188.12 | 358.20 | 179.60 | 357.21 | 179.11 | 3 |
| 22 | 2514.18 | 1257.59 | 2497.15 | 1249.08 | 2496.17 | 1248.59 | V | 246.18 | 123.59 | 229.15 | 115.08 |        |        | 2 |
| 23 |         |         |         |         |         |         | K | 147.11 | 74.06  | 130.09 | 65.55  |        |        | 1 |

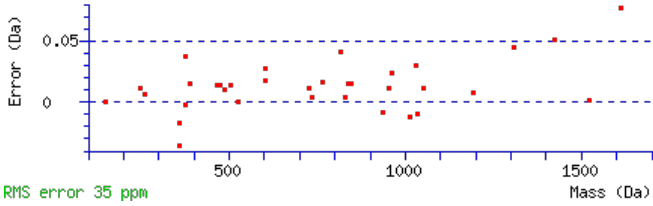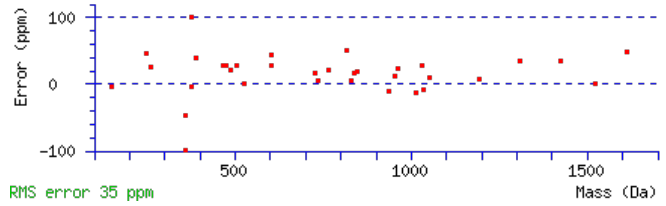

NCBI BLAST search of [FNKVN<sub>Y</sub>ANVSTNN<sub>Y</sub>ALDEVEEVK](#)

(Parameters: blastp, nr protein database, expect=20000, no filter, PAM30)

Other BLAST [web gateways](#)

### All matches to this query

| Score | Mr(calc): | Delta | Sequence                                                      |
|-------|-----------|-------|---------------------------------------------------------------|
| 91.0  | 2659.28   | 0.09  | <a href="#">FNKVN<sub>Y</sub>ANVSTNN<sub>Y</sub>ALDEVEEVK</a> |
| 5.2   | 2659.28   | 0.08  | <a href="#">SYQOPSRIA<sub>Y</sub>IEFFVKPEVDED</a>             |
| 0.3   | 2659.40   | -0.03 | <a href="#">GNFANTNYIFQVIFALPLIVFCR</a>                       |
| 0.3   | 2659.28   | 0.09  | <a href="#">KPDDERDQLDNT<sub>P</sub>SSDVQMLKTK</a>            |

Mascot: <http://www.matrixscience.com/>



# Mascot Search Results

## Peptide View

### MS/MS Fragmentation of **PKTRYPVVVR**

Found in **Solyc09g063130.2.1**, genomic\_reference:SL2.40ch09 gene\_region:56787134-56789056

transcript\_region:SL2.40ch09:56787134..56789056+ go\_terms:GO:0009536,GO:0009538

functional\_description:""Photosystem I reaction center subunit IV A (AHRD V1 \*-\*- B6TH55\_MAIZE);

contains Inter

Match to Query 2869: 1213.713964 from(607.864258,2+)

Title: cyr\_090307\_maja\_05\_2\_bi3\_p.01139.01139.2\_25.378mins

Data file G:\Processed DATA\mgf\090307\_uniqua\_mgf\MGF\for Merge\merged\_maja0307 (2).mgf

Click mouse within plot area to zoom in by factor of two about that point

Or,   to  Da

Label all possible matches  Label matches used for scoring

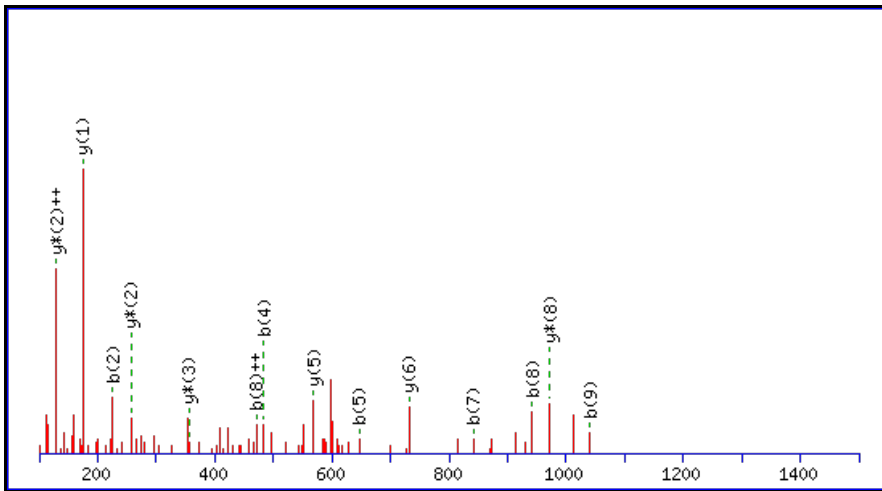

**Monoisotopic mass of neutral peptide Mr(calc):** 1213.73

**Ions Score:** 46 **Expect:** 0.0086

**Matches:** 14/88 fragment ions using 20 most intense peaks ([help](#))

| #  | b              | b <sup>++</sup> | b <sup>*</sup> | b <sup>*++</sup> | b <sup>0</sup> | b <sup>0++</sup> | Seq. | y             | y <sup>++</sup> | y <sup>*</sup> | y <sup>*++</sup> | y <sup>0</sup> | y <sup>0++</sup> | #  |
|----|----------------|-----------------|----------------|------------------|----------------|------------------|------|---------------|-----------------|----------------|------------------|----------------|------------------|----|
| 1  | 98.06          | 49.53           |                |                  |                |                  | P    |               |                 |                |                  |                |                  | 10 |
| 2  | <b>226.16</b>  | 113.58          | 209.13         | 105.07           |                |                  | K    | 1117.68       | 559.35          | 1100.66        | 550.83           | 1099.67        | 550.34           | 9  |
| 3  | 327.20         | 164.10          | 310.18         | 155.59           | 309.19         | 155.10           | T    | 989.59        | 495.30          | <b>972.56</b>  | 486.78           | 971.58         | 486.29           | 8  |
| 4  | <b>483.30</b>  | 242.16          | 466.28         | 233.64           | 465.29         | 233.15           | R    | 888.54        | 444.77          | 871.51         | 436.26           |                |                  | 7  |
| 5  | <b>646.37</b>  | 323.69          | 629.34         | 315.17           | 628.36         | 314.68           | Y    | <b>732.44</b> | 366.72          | 715.41         | 358.21           |                |                  | 6  |
| 6  | 743.42         | 372.21          | 726.39         | 363.70           | 725.41         | 363.21           | P    | <b>569.38</b> | 285.19          | 552.35         | 276.68           |                |                  | 5  |
| 7  | <b>842.49</b>  | 421.75          | 825.46         | 413.23           | 824.48         | 412.74           | V    | 472.32        | 236.67          | 455.30         | 228.15           |                |                  | 4  |
| 8  | <b>941.56</b>  | <b>471.28</b>   | 924.53         | 462.77           | 923.55         | 462.28           | V    | 373.26        | 187.13          | <b>356.23</b>  | 178.62           |                |                  | 3  |
| 9  | <b>1040.63</b> | 520.82          | 1023.60        | 512.30           | 1022.61        | 511.81           | V    | 274.19        | 137.60          | <b>257.16</b>  | <b>129.08</b>    |                |                  | 2  |
| 10 |                |                 |                |                  |                |                  | R    | <b>175.12</b> | 88.06           | 158.09         | 79.55            |                |                  | 1  |

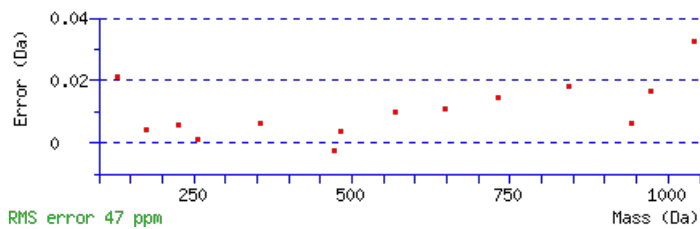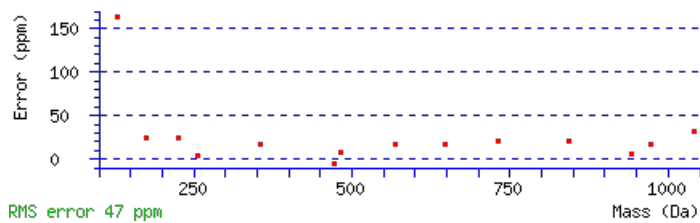

NCBI **BLAST** search of [PKTRYPVVVR](#)

(Parameters: blastp, nr protein database, expect=20000, no filter, PAM30)

Other BLAST [web gateways](#)

### All matches to this query

| Score | Mr(calc): | Delta | Sequence                     |
|-------|-----------|-------|------------------------------|
| 46.3  | 1213.73   | -0.02 | <a href="#">PKTRYPVVVR</a>   |
| 25.3  | 1213.67   | 0.04  | <a href="#">QLCVQRNVVR</a>   |
| 20.0  | 1213.77   | -0.06 | <a href="#">KKLTKRERR</a>    |
| 18.8  | 1213.69   | 0.02  | <a href="#">ELLRESGRVR</a>   |
| 15.9  | 1213.71   | 0.01  | <a href="#">QVQVCVRKVR</a>   |
| 15.0  | 1213.64   | 0.07  | <a href="#">QLNDKERVAAA</a>  |
| 13.5  | 1213.70   | 0.02  | <a href="#">MKVOGIGQVVR</a>  |
| 13.2  | 1213.64   | 0.07  | <a href="#">QQDVKIDVNR</a>   |
| 12.2  | 1213.71   | -0.00 | <a href="#">KGAQTAASLVLR</a> |
| 11.4  | 1213.64   | 0.07  | <a href="#">KPLVMYSLTY</a>   |

**Mascot:** <http://www.matrixscience.com/>

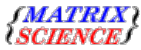

# Mascot Search Results

## Peptide View

### MS/MS Fragmentation of **NKVN<sup>+</sup>YANVSTNNYALDEVE**

Found in **Solyc09g063130.2.1**, genomic\_reference:SL2.40ch09 gene\_region:56787134-56789056

transcript\_region:SL2.40ch09:56787134..56789056+ go\_terms:GO:0009536,GO:0009538

functional\_description: ""Photosystem I reaction center subunit IV A (AHRD V1 \*-\*- B6TH55\_MAIZE); contains Inter

Match to Query 13107: 2156.001806 from(1079.008179,2+)

Title: cyr\_090307\_meja\_05\_2\_bi3\_p.01559.01559.2\_36.335mins

Data file G:\Processed DATA\mgf\090307\_uniqua\_mgf\MGF\for Merge\merged meja0307 (2).mgf

Click mouse within plot area to zoom in by factor of two about that point

Or,   to  Da

Label all possible matches  Label matches used for scoring

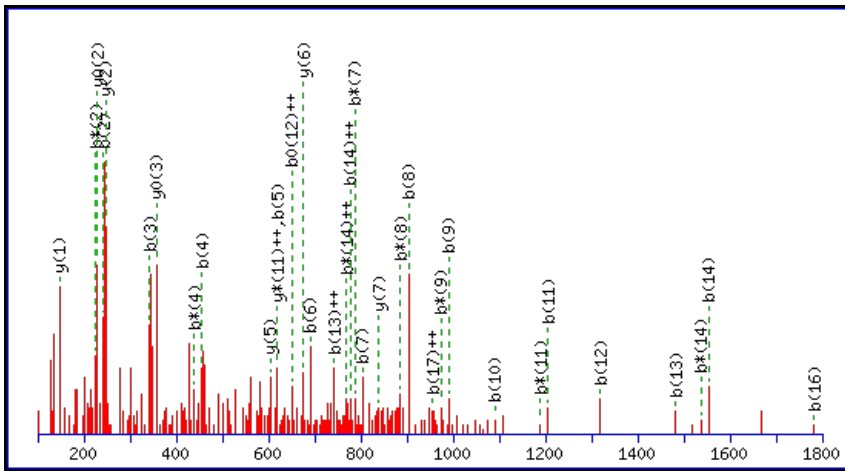

**Monoisotopic mass of neutral peptide Mr(calc):** 2156.00

**Ions Score:** 86 **Expect:** 5.7e-007

**Matches :** 34/186 fragment ions using 62 most intense peaks ([help](#))

| #  | b              | b <sup>++</sup> | b <sup>*</sup> | b <sup>*++</sup> | b <sup>0</sup> | b <sup>0++</sup> | Seq. | y             | y <sup>++</sup> | y <sup>*</sup> | y <sup>*++</sup> | y <sup>0</sup> | y <sup>0++</sup> | #  |
|----|----------------|-----------------|----------------|------------------|----------------|------------------|------|---------------|-----------------|----------------|------------------|----------------|------------------|----|
| 1  | 115.05         | 58.03           | 98.02          | 49.52            |                |                  | N    |               |                 |                |                  |                |                  | 19 |
| 2  | <b>243.15</b>  | 122.08          | <b>226.12</b>  | 113.56           |                |                  | K    | 2042.97       | 1021.99         | 2025.94        | 1013.47          | 2024.96        | 1012.98          | 18 |
| 3  | <b>342.21</b>  | 171.61          | 325.19         | 163.10           |                |                  | V    | 1914.87       | 957.94          | 1897.85        | 949.43           | 1896.86        | 948.93           | 17 |
| 4  | <b>456.26</b>  | 228.63          | <b>439.23</b>  | 220.12           |                |                  | N    | 1815.80       | 908.41          | 1798.78        | 899.89           | 1797.79        | 899.40           | 16 |
| 5  | <b>619.32</b>  | 310.16          | 602.29         | 301.65           |                |                  | Y    | 1701.76       | 851.38          | 1684.73        | 842.87           | 1683.75        | 842.38           | 15 |
| 6  | <b>690.36</b>  | 345.68          | 673.33         | 337.17           |                |                  | A    | 1538.70       | 769.85          | 1521.67        | 761.34           | 1520.69        | 760.85           | 14 |
| 7  | <b>804.40</b>  | 402.70          | <b>787.37</b>  | 394.19           |                |                  | N    | 1467.66       | 734.33          | 1450.63        | 725.82           | 1449.65        | 725.33           | 13 |
| 8  | <b>903.47</b>  | 452.24          | <b>886.44</b>  | 443.72           |                |                  | V    | 1353.62       | 677.31          | 1336.59        | 668.80           | 1335.61        | 668.31           | 12 |
| 9  | <b>990.50</b>  | 495.75          | <b>973.47</b>  | 487.24           | 972.49         | 486.75           | S    | 1254.55       | 627.78          | 1237.52        | <b>619.26</b>    | 1236.54        | 618.77           | 11 |
| 10 | <b>1091.55</b> | 546.28          | 1074.52        | 537.76           | 1073.54        | 537.27           | T    | 1167.52       | 584.26          | 1150.49        | 575.75           | 1149.51        | 575.26           | 10 |
| 11 | <b>1205.59</b> | 603.30          | <b>1188.56</b> | 594.79           | 1187.58        | 594.29           | N    | 1066.47       | 533.74          | 1049.44        | 525.22           | 1048.46        | 524.73           | 9  |
| 12 | <b>1319.63</b> | 660.32          | 1302.61        | 651.81           | 1301.62        | <b>651.32</b>    | N    | 952.43        | 476.72          | 935.40         | 468.20           | 934.42         | 467.71           | 8  |
| 13 | <b>1482.70</b> | <b>741.85</b>   | 1465.67        | 733.34           | 1464.69        | 732.85           | Y    | <b>838.38</b> | 419.70          |                |                  | 820.37         | 410.69           | 7  |
| 14 | <b>1553.73</b> | <b>777.37</b>   | <b>1536.71</b> | <b>768.86</b>    | 1535.72        | 768.37           | A    | <b>675.32</b> | 338.16          |                |                  | 657.31         | 329.16           | 6  |



|    |         |         |         |        |         |        |   |        |        |  |  |        |        |   |
|----|---------|---------|---------|--------|---------|--------|---|--------|--------|--|--|--------|--------|---|
| 15 | 1666.82 | 833.91  | 1649.79 | 825.40 | 1648.81 | 824.91 | L | 604.28 | 302.64 |  |  | 586.27 | 293.64 | 5 |
| 16 | 1781.85 | 891.43  | 1764.82 | 882.91 | 1763.83 | 882.42 | D | 491.20 | 246.10 |  |  | 473.19 | 237.10 | 4 |
| 17 | 1910.89 | 955.95  | 1893.86 | 947.43 | 1892.88 | 946.94 | E | 376.17 | 188.59 |  |  | 358.16 | 179.58 | 3 |
| 18 | 2009.96 | 1005.48 | 1992.93 | 996.97 | 1991.95 | 996.48 | V | 247.13 | 124.07 |  |  | 229.12 | 115.06 | 2 |
| 19 |         |         |         |        |         |        | E | 148.06 | 74.53  |  |  | 130.05 | 65.53  | 1 |

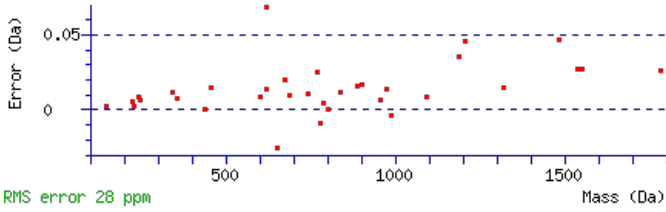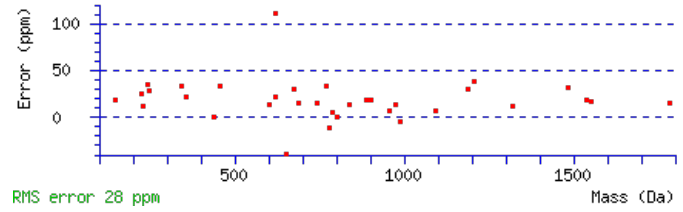

NCBI **BLAST** search of [NKVNYANVSTNNYALDEVE](#)

(Parameters: blastp, nr protein database, expect=20000, no filter, PAM30)

Other BLAST [web gateways](#)

### All matches to this query

| Score | Mr(calc): | Delta | Sequence                              |
|-------|-----------|-------|---------------------------------------|
| 86.3  | 2156.00   | -0.00 | <a href="#">NKVNYANVSTNNYALDEVE</a>   |
| 6.7   | 2156.00   | 0.01  | <a href="#">FLDFNSYYSICALCAKGE</a>    |
| 4.3   | 2156.06   | -0.06 | <a href="#">QGPARSQLMSQSQGSSQGLPI</a> |
| 4.0   | 2156.07   | -0.07 | <a href="#">DLDMEEALGLTMHKKIPLC</a>   |
| 3.0   | 2156.01   | -0.01 | <a href="#">FPLEFMREEDLRPAFME</a>     |
| 1.7   | 2155.96   | 0.04  | <a href="#">LMLANNARDDYFEDAADRQ</a>   |
| 0.4   | 2155.97   | 0.04  | <a href="#">DEVLLDGFCDLSNESMLEK</a>   |

**Mascot:** <http://www.matrixscience.com/>
